# Supplementary material for: Longitudinal monitoring of immunoglobulin A glycosylation during pregnancy by simultaneous MALDI-FTICR-MS analysis of N- and O-glycopeptides
Source: PubMed Central journal article supplement (PMC4908400; doi:10.1038/srep27955), 2016-06-15
Supplement: srep27955-s1.pdf [file srep27955-s1.pdf]

# Longitudinal monitoring of immunoglobulin A glycosylation during pregnancy by simultaneous MALDI-FTICR-MS analysis of *N*- and *O*-glycopeptides

Albert Bondt<sup>1,2,\*</sup>, Simone Nicolardi<sup>2,§</sup>, Bas C. Jansen<sup>2,§</sup>, Kathrin Stavenhagen<sup>3</sup>, Dennis Blank<sup>2</sup>, Guinevere S.M. Kammeijer<sup>2</sup>, Radoslaw P. Kozak<sup>4</sup>, Daryl L. Fernandes<sup>4</sup>, Paul J. Hensbergen<sup>2</sup>, Johanna M.W. Hazes<sup>1</sup>, Yuri E.M. van der Burgt<sup>2</sup>, Radboud J.E.M. Dolhain<sup>1</sup>, Manfred Wuhler<sup>2,3,5</sup>

<sup>1</sup> Department of Rheumatology, Erasmus University Medical Center, Rotterdam, The Netherlands

<sup>2</sup> Center for Proteomics and Metabolomics, Leiden University Medical Center, Leiden, The Netherlands

<sup>3</sup> Division of BioAnalytical Chemistry, VU University Amsterdam, The Netherlands

<sup>4</sup> Ludger, Culham Science Centre, Oxfordshire OX14 3EB, UK

<sup>5</sup> Department of Molecular Cell Biology and Immunology, VU University Medical Center, Amsterdam, The Netherlands

\* Correspondence to: Albert Bondt, PO Box 9600, 2300 RC Leiden; [a.bondt@lumc.nl](mailto:a.bondt@lumc.nl); tel. +31 (0)71 52 68701

Supplementary Material S1  
Supplementary Tables S1-S5  
Supplementary Figures S1-S4  
Supplementary Methods

## Supplementary Material S1 – alignment of UniProt protein sequences for the heavy chains of IgA1

**(P01876 in blue) and IgA2 (P01877 in green)** Potential N-linked glycosylation sites are marked in yellow and by underlining (N-X-S/T; X≠P); literature based O-linked glycosylation sites are marked in pink and by underlining. Sequence differences on IgA2 are depicted by italic font. Cysteines mentioned on UniProt to be involved in disulphide bonds are depicted in red. In addition, the disulphide links are mentioned below.

```
>sp|P01876|IGHA1_HUMAN Ig alpha-1 chain C region OS=Homo sapiens GN=IGHA1 PE=1 SV=2
>sp|P01877|IGHA2_HUMAN Ig alpha-2 chain C region OS=Homo sapiens GN=IGHA2 PE=1 SV=3
```

```

1 ASPTSPKVFP LSLCSTQPDG NVVIACLVQG FFPQEPLSVT WSESGQGVTA
1 ASPTSPKVFP LSLDSTPQDG NVVVACLVQG FFPQEPLSVT WSESGQGVTA

51 RNFPPSQDAS GDLYTTSSQL TLPATQCLAG KSVTCHVKHY TNPSQDVTVP
51 RNFPPSQDAS GDLYTTSSQL TLPATQCPDG KSVTCHVKHY TNPSQDVTVP

101 CPVPSTPPTP SPSTPPTPSP SCCHPRLSLH RPALEDLLLG SEANLTCTLT
101 CPVPPPPCC HP RLSLH RPALEDLLLG SEANLTCTLT

151 GLRDASGVTF TWPSSGKSA VQGPPERDLC GCYSVSSVLP GCAEPWNHGK
138 GLRDASGATF TWPSSGKSA VQGPPERDLC GCYSVSSVLP GCAQPWNHGE

201 TFTCTAAYPE SKTPLTATLS KSGNTERPEV HLLPPPSEEL ALNELVTLTC
188 TFTCTAAHPE LKTPLTANIT KSGNTERPEV HLLPPPSEEL ALNELVTLTC

251 LARGFSPKDV LVRWLQGSQE LPREKYLTWA SRQEPSQGT TFAVTSILRV
238 LARGFSPKDV LVRWLQGSQE LPREKYLTWA SRQEPSQGT TFAVTSILRV

301 AAEDWKKGDT FSCMVGHEAL PLAFTQKTID RLAGKPTHVN VSVVMAEVDG TCY
288 AAEDWKKGDT FSCMVGHEAL PLAFTQKTID RMAGKPTHVN VSVVMAEVDG TCY
```

```

IgA1 Cys14 Interchain met light chain
Cys26-85 Intrachain
Cys77-101 Intrachain
Cys122 Interchain with heavy chain
Cys123-180 (182) Intrachain
Cys147-204 Intrachain
Cys182 (180) Interchain with heavy chain
Cys192 Interchain with heavy chain of other subunit
Cys250-313 Intrachain
Cys352 Interchain with J-chain
IgA2 Cys26-85 Intrachain
Cys101 Interchain with light chain
Cys109 Interchain with heavy chain
Cys110-167 Intrachain
Cys134-191 Intrachain
Cys169 Interchain with heavy chain
Cys179 Interchain with heavy chain of other subunit
Cys237-300 Intrachain
Cys339 Interchain with J-chain
```

**Supplementary Table S1** Mascot search results obtained from LC-MS/MS for an IgA tryptic digest **(A)** and a deglycosylated tryptic digest **(B)**.

**A**

| Protein ID                                                                 | Assigned peptide sequence         | Precursor charge | Precursor m/z | modification    | Max. score | All possible other proteins for a peptide |
|----------------------------------------------------------------------------|-----------------------------------|------------------|---------------|-----------------|------------|-------------------------------------------|
| Ig alpha-1 chain C region (P01876; prot.score:911; #pep.:13; seq.cov.:45%) | NFPPSQDASGDLYTSSQLTLPATQC<br>LAGK | 4+               | 793.267       | Deamidated (2x) | 41         | U <sup>a</sup>                            |
|                                                                            | DASGVTFTWTPSSGK                   | 2+               | 771.011       |                 | 67         | U                                         |
|                                                                            | SAVQGPPER                         | 2+               | 470.793       |                 | 53         | P01877                                    |
|                                                                            | DLCGCYSVSSVLPGCAEPWNHGK           | 3+               | 865.486       |                 | 91         | U                                         |
|                                                                            | TFTCTAAYPESK                      | 2+               | 688.395       |                 | 45         | U                                         |
|                                                                            | TPLTATLSK                         | 2+               | 466.310       |                 | 47         | U                                         |
|                                                                            | WLQGSQELPR                        | 2+               | 607.430       |                 | 67         | P01877                                    |
|                                                                            | YLTWASR                           | 2+               | 488.816       |                 | 33         | P01877                                    |
|                                                                            | QEPSQGTTTTFAVTSILR                | 2+               | 918.584       |                 | 89         | P01877                                    |
|                                                                            | VAAEDWK                           | 2+               | 409.790       |                 | 44         | P01877                                    |
| GDTFSCMVGHEALPLAFTQK                                                       | 3+                                | 737.480          |               | 36              | P01877     |                                           |
| Ig alpha-2 chain C region (P01877; prot.score:420; #pep.:8; seq.cov.:32%)  | HYTNPSQDVTVPCPVPPPPCCHPR          | 4+               | 728.141       |                 | 37         | U                                         |
|                                                                            | DASGATFTWTPSSGK                   | 2+               | 756.963       |                 | 44         | U                                         |
|                                                                            | SAVQGPPER                         | 2+               | 470.793       |                 | 53         | P01876                                    |
|                                                                            | WLQGSQELPR                        | 2+               | 607.430       |                 | 67         | P01876                                    |
|                                                                            | YLTWASR                           | 2+               | 488.816       |                 | 33         | P01876                                    |
|                                                                            | QEPSQGTTTTFAVTSILR                | 2+               | 918.571       |                 | 87         | P01876                                    |
|                                                                            | VAAEDWK                           | 2+               | 409.790       |                 | 44         | P01876                                    |
|                                                                            | GDTFSCMVGHEALPLAFTQK              | 3+               | 737.480       |                 | 36         | P01876                                    |

<sup>a</sup> U indicates that the peptide is unique for this protein.

|                                                                                 |                       |         |          |            |    |   |
|---------------------------------------------------------------------------------|-----------------------|---------|----------|------------|----|---|
| Serum albumin (P02768; prot.score:808; #pep.:21; seq.cov.:40%)                  | DLGEEENFK             | 2+      | 476.295  |            | 31 | U |
|                                                                                 | ALVLIAFAQYLQQCPFEDHVK | 3+      | 831.574  | Deamidated | 65 | U |
|                                                                                 | LVNEVTEFAK            | 2+      | 575.354  |            | 48 | U |
|                                                                                 | TCVADESAENCDK         | 2+      | 749.856  |            | 97 | U |
|                                                                                 | SLHTLFGDK             | 2+      | 509.322  |            | 36 | U |
|                                                                                 | ETYGEMADCCAK          | 3+      | 479.238  |            | 42 | U |
|                                                                                 | DDNPNLPR              | 2+      | 470.779  |            | 38 | U |
|                                                                                 | YLYEIAR               | 2+      | 464.340  |            | 52 | U |
|                                                                                 | AAFTECCQAADK          | 2+      | 686.374  |            | 52 | U |
|                                                                                 | AEFAEVSK              | 2+      | 440.778  |            | 40 | U |
|                                                                                 | VHTECCHGDLLECADDR     | 4+      | 552.615  |            | 33 | U |
|                                                                                 | YICENQDSISSK          | 2+      | 722.389  |            | 61 | U |
|                                                                                 | CCAAADPHECYAK         | 2+      | 776.881  |            | 56 | U |
|                                                                                 | VFDEFKPLVEEPQNLIK     | 3+      | 682.504  |            | 54 | U |
|                                                                                 | QNCLEFEQLGEYK         | 2+      | 829.455  |            | 59 | U |
|                                                                                 | FQNALLVR              | 2+      | 480.847  |            | 53 | U |
|                                                                                 | KVPQVSTPTLVEVSR       | 3+      | 547.385  |            | 56 | U |
|                                                                                 | CCTESLVNR             | 2+      | 569.810  |            | 34 | U |
|                                                                                 | RPCFSALEVDETYVPK      | 3+      | 637.773  |            | 44 | U |
|                                                                                 | QTALVELVK             | 2+      | 500.860  |            | 37 | U |
| AVMDDFAAFVEK                                                                    | 2+                    | 671.964 |          | 61         | U  |   |
| LVAASQAALGL                                                                     | 2+                    | 507.389 |          | 77         | U  |   |
| Ig kappa chain C region (A0A087X130; prot.score:763; #pep.:6; seq.cov.:40%)     | LLIYGASTR             | 2+      | 497.352  |            | 46 | U |
|                                                                                 | TVAAPSVFIFPPSDEQLK    | 2+      | 973.618  |            | 54 | U |
|                                                                                 | SGTASVVCLLNNFYPR      | 2+      | 900.022  |            | 50 | U |
|                                                                                 | VDNALQSGNSQESVTEQDSK  | 2+      | 1068.567 |            | 78 | U |
|                                                                                 | DSTYLSSTLTLSK         | 2+      | 752.033  |            | 64 | U |
|                                                                                 | VYACEVTHQGLSPVTK      | 3+      | 626.060  |            | 57 | U |
| Ig lambda-2 chain C regions (A0A075B6K9; prot.score:670; #pep.:5; seq.cov.:74%) | AAPSVTLFPPSSEELQANK   | 2+      | 994.045  |            | 45 | U |

|                                                                                 |                        |    |          |            |    |                           |
|---------------------------------------------------------------------------------|------------------------|----|----------|------------|----|---------------------------|
|                                                                                 | ATLVCLISDFYPGAVTVAWK   | 2+ | 1106.697 |            | 79 | U                         |
|                                                                                 | AGVETTTPSK             | 2+ | 495.808  |            | 62 | U                         |
|                                                                                 | YAASSYLSLTPEQWK        | 2+ | 872.561  |            | 71 | U                         |
|                                                                                 | SYSCQVTHEGSTVEK        | 2+ | 856.468  |            | 62 | U                         |
| Protein IGHV3-23 (A0A087WSX3; prot.score:166; #pep.:2; seq.cov.:18%)            | NTLYLQMNSLR            | 2+ | 676.930  |            | 72 | P01768;                   |
|                                                                                 | AEDTAVYYCAK            | 2+ | 645.876  |            | 71 | A0A075B7B8<br>U           |
| Ig heavy chain V-III region CAM (P01768; prot.score:141; #pep.:2; seq.cov.:18%) | NTLYLQMNSLR            | 2+ | 676.930  |            | 72 | A0A087WSX3;               |
|                                                                                 | AENTAVYYCAR            | 2+ | 659.883  | Deamidated | 57 | A0A075B7B8<br>U           |
| Protein IGHV3OR16-12 (A0A075B7B8; prot.score:140; #pep.:2; seq.cov.:18%)        | NTLYLQMNSLR            | 2+ | 676.930  |            | 72 | A0A087WSX3;               |
|                                                                                 | VEDTAVYYCAR            | 2+ | 673.874  |            | 62 | P01768<br>U               |
| Protein IGHV3OR16-9 (S4R460; prot.score:115; #pep.:2; seq.cov.:31%)             | EVQLVESGGGLVQPGGSLR    | 2+ | 941.588  |            | 73 | U                         |
|                                                                                 | NSLYLQMNSLR            | 2+ | 669.863  |            | 58 | A0A087X2C0;<br>A0A087WV47 |
| Ig mu chain C region (A0A087X2C0; prot.score:112; #pep.:10; seq.cov.:23%)       | NSLYLQMNSLR            | 2+ | 669.863  |            | 58 | S4R460;                   |
|                                                                                 | AEDTAVYYCAR            | 2+ | 660.395  |            | 56 | A0A087WV47                |
|                                                                                 | YAATSQVLLPSK           | 2+ | 639.450  |            | 42 | A0A087WV47<br>U           |
|                                                                                 | VSVFVPPR               | 2+ | 450.880  |            | 41 | U                         |
|                                                                                 | LICQATGFSPR            | 2+ | 625.389  |            | 34 | U                         |
|                                                                                 | QVGSGVTTDQVQAEAK       | 2+ | 809.556  |            | 35 | U                         |
|                                                                                 | FTCTVHTDLPSPK          | 3+ | 573.017  |            | 34 | U                         |
|                                                                                 | GVALHRPDVYLLPPAR       | 3+ | 592.442  |            | 37 | U                         |
|                                                                                 | ESATITCLVTGFSPADVQWMQR | 3+ | 915.822  | Deamidated | 36 | U                         |
|                                                                                 | YVTSAPMPEQPAPGR        | 2+ | 800.934  |            | 41 | U                         |
| Ig gamma-1 chain C region (A0A087WV47; prot.score:91; #pep.:5; seq.cov.:11%)    | NSLYLQMNSLR            | 2+ | 669.863  |            | 58 | S4R460;                   |
|                                                                                 | AEDTAVYYCAR            | 2+ | 660.395  |            | 56 | A0A087X2C0                |
|                                                                                 | DTLMISR                | 2+ | 418.299  |            | 40 | A0A087X2C0<br>U           |
|                                                                                 | FNWYVDGVEVHNAK         | 3+ | 560.075  |            | 46 | U                         |

|                                                                                 |                        |    |         |  |    |   |
|---------------------------------------------------------------------------------|------------------------|----|---------|--|----|---|
| Transthyretin (AOA087WT59; prot.score:130; #pep.:3; seq.cov.:25%)               | NQVSLTCLVK             | 2+ | 581.424 |  | 40 | U |
|                                                                                 | GSPAINVAVHVFR          | 2+ | 684.019 |  | 70 | U |
|                                                                                 | AADDTWEPFASGK          | 2+ | 697.908 |  | 61 | U |
|                                                                                 | TSESGELHGLTTEEEFVEGIYK | 3+ | 819.144 |  | 42 | U |
| Ig kappa chain V-III region SIE (P01620; prot.score:128; #pep.:2; seq.cov.:22%) | LLIYGASSR              | 2+ | 490.350 |  | 55 | U |
|                                                                                 | FSGSGSGTDFTLTISR       | 2+ | 817.019 |  | 74 | U |
| Alpha-2-macroglobulin (P01620; prot.score:56; #pep.:4; seq.cov.:3%)             | NEDSLVQVQTDK           | 2+ | 697.941 |  | 55 | U |
|                                                                                 | YDVENCLANK             | 2+ | 613.895 |  | 33 | U |
|                                                                                 | SSGSLNNAIK             | 2+ | 552.416 |  | 32 | U |
|                                                                                 | TAQEGDHGSHVYTK         | 3+ | 510.669 |  | 32 | U |

## B

| Protein ID                                                                            | Assigned peptide sequence                          | Precursor charge | Precursor m/z | modification | Max. score | All possible proteins for a peptide |
|---------------------------------------------------------------------------------------|----------------------------------------------------|------------------|---------------|--------------|------------|-------------------------------------|
| Ig alpha-1 chain C region trunc. Y (P01876b; prot.score:2032; #pep.:15; seq.cov.:69%) | NFPPSQDASGDLYTTSSQLTPATQC<br>LAGK                  | 3+               | 1057.298      |              | 33         | P01876                              |
|                                                                                       | SVTCHVK                                            | 2+               | 415.808       |              | 37         | P01876; P01877                      |
|                                                                                       | LSLHRPALEDLLLGEANLTCTLTGLR                         | 3+               | 988.942       | Deamidated   | 110        | P01876; P01877                      |
|                                                                                       | DASGVFTWTPSSGK                                     | 2+               | 770.942       |              | 75         | P01876                              |
|                                                                                       | SAVQGPPER                                          | 2+               | 470.793       |              | 49         | P01876; P01877                      |
|                                                                                       | DLCGCYSVSSVLPGCAEPWNHGK                            | 3+               | 865.246       |              | 60         | P01876                              |
|                                                                                       | TFTCTAAYPESK                                       | 2+               | 688.346       |              | 47         | P01876                              |
|                                                                                       | TPLTATLSK                                          | 2+               | 466.392       |              | 44         | P01876                              |
|                                                                                       | SGN <sup>N</sup> TFRPEVHLLPPPSEELALNELVTL<br>TCLAR | 4+               | 894.591       | Deamidated   | 30         | P01876; P01877                      |

|                                                                             |                                     |    |          |            |     |                 |
|-----------------------------------------------------------------------------|-------------------------------------|----|----------|------------|-----|-----------------|
|                                                                             | WLQGSQELPR                          | 2+ | 607.407  |            | 70  | P01876; P01877  |
|                                                                             | YLTWASR                             | 2+ | 488.822  |            | 44  | P01876; P01877  |
|                                                                             | QEPSQGTTTTFAVTSILR                  | 2+ | 918.619  |            | 86  | P01876; P01877  |
|                                                                             | VAAEDWK                             | 2+ | 409.799  |            | 44  | P01876; P01877  |
|                                                                             | GDTFSCMVGHEALPLAFTQK                | 2+ | 1105.138 |            | 54  | P01876; P01877  |
|                                                                             | LAGKPTHVNVSVVMAEVDGTC               | 3+ | 729.426  | Deamidated | 81  | U               |
| Ig alpha-1 chain C region (P01876; prot.score:1548; #pep.:15; seq.cov.:69%) | NFPPSQDASGDLYTTSSQLTLPATQC<br>LAGK  | 3+ | 1057.298 |            | 33  | P01876b         |
|                                                                             | SVTCHVK                             | 2+ | 415.808  |            | 37  | P01876b; P01877 |
|                                                                             | LSLHRPAEDLLLGEANLTCTLTGLR           | 3+ | 988.942  | Deamidated | 110 | P01876b; P01877 |
|                                                                             | DASGVFTWTPSSGK                      | 2+ | 770.942  |            | 75  | P01876b         |
|                                                                             | SAVQGPPER                           | 2+ | 470.793  |            | 49  | P01876b; P01877 |
|                                                                             | DLCGCYSVSSVLPGCAEPWNHGK             | 3+ | 865.246  |            | 60  | P01876b         |
|                                                                             | TFTCTAAYPEK                         | 2+ | 688.346  |            | 47  | P01876b         |
|                                                                             | TPLTATLSK                           | 2+ | 466.392  |            | 44  | P01876b         |
|                                                                             | SGNTRPEVHLLPPPSEELALNELVTL<br>TCLAR | 4+ | 894.591  | Deamidated | 30  | P01876b; P01877 |
|                                                                             | WLQGSQELPR                          | 2+ | 607.407  |            | 70  | P01876b; P01877 |
|                                                                             | YLTWASR                             | 2+ | 488.822  |            | 44  | P01876b; P01877 |
|                                                                             | QEPSQGTTTTFAVTSILR                  | 2+ | 918.619  |            | 86  | P01876b; P01877 |
|                                                                             | VAAEDWK                             | 2+ | 409.799  |            | 44  | P01876b; P01877 |
|                                                                             | GDTFSCMVGHEALPLAFTQK                | 2+ | 1105.138 |            | 54  | P01876b; P01877 |
|                                                                             | LAGKPTHVNVSVVMAEVDGTCY              | 3+ | 783.484  | Deamidated | 87  | U               |
| Ig alpha-2 chain C region (P01877; prot.score:623; #pep.:11; seq.cov.:47%)  | SVTCHVK                             | 2+ | 415.808  |            | 37  | P01876;P01876b  |
|                                                                             | LSLHRPAEDLLLGEANLTCTLTGLR           | 3+ | 988.942  | Deamidated | 110 | P01876;P01876b  |
|                                                                             | DASGATFTWTPSSGK                     | 2+ | 756.998  |            | 40  | U               |
|                                                                             | SAVQGPPER                           | 2+ | 470.793  |            | 49  | P01876;P01876b  |
|                                                                             | TPLTANITK                           | 2+ | 480.333  | Deamidated | 46  | U               |
|                                                                             | SGNTRPEVHLLPPPSEELALNELVTL<br>TCLAR | 4+ | 894.591  | Deamidated | 30  | P01876;P01876b  |
|                                                                             | WLQGSQELPR                          | 2+ | 607.407  |            | 70  | P01876;P01876b  |

|                                                                             |                                 |    |          |            |     |                |
|-----------------------------------------------------------------------------|---------------------------------|----|----------|------------|-----|----------------|
|                                                                             | YLTWASR                         | 2+ | 488.822  |            | 44  | P01876;P01876b |
|                                                                             | QEPSQGTTFVAVTSILR               | 2+ | 918.619  |            | 86  | P01876;P01876b |
|                                                                             | VAAEDWK                         | 2+ | 409.799  |            | 44  | P01876;P01876b |
|                                                                             | GDTFSCMVGHEALPLAFTQK            | 2+ | 1105.138 |            | 54  | P01876;P01876b |
| Serum albumin (P02768; prot.score:798; #pep.:23; seq.cov.:49%)              | LVNEVTEFAK                      | 2+ | 575.404  |            | 48  | U              |
|                                                                             | TCVADESAENCDK                   | 2+ | 749.854  |            | 111 | U              |
|                                                                             | SLHTLFGDK                       | 2+ | 509.356  |            | 32  | U              |
|                                                                             | ETYGEMADCCAK                    | 2+ | 717.879  |            | 42  | U              |
|                                                                             | LVRPEVDVMCTAFHDNEETFLK          | 3+ | 884.159  |            | 46  | U              |
|                                                                             | LYEYIAR                         | 2+ | 464.311  |            | 46  | U              |
|                                                                             | AAFTECCQAADK                    | 2+ | 686.396  |            | 51  | U              |
|                                                                             | AEFAEVSK                        | 2+ | 440.767  |            | 38  | U              |
|                                                                             | VHTECCHGDLLECADDR               | 4+ | 552.557  |            | 33  | U              |
|                                                                             | YICENQDSISSK                    | 2+ | 722.405  |            | 78  | U              |
|                                                                             | SHCIAEVENDEMPADLPSLAADFVE<br>SK | 4+ | 744.947  | Deamidated | 31  | U              |
|                                                                             | DVFLGMFLYEYAR                   | 2+ | 812.536  |            | 47  | U              |
|                                                                             | TYETTLEK                        | 2+ | 492.791  |            | 35  | U              |
|                                                                             | CCAAADPHECYAK                   | 2+ | 776.878  |            | 45  | U              |
|                                                                             | VFDEFKPLVEEPQNLIK               | 2+ | 1023.108 |            | 44  | U              |
|                                                                             | QNCELFEQLGEYK                   | 2+ | 829.994  |            | 66  | U              |
|                                                                             | FQNALLVR                        | 2+ | 480.796  |            | 56  | U              |
|                                                                             | MPCAEDYLSVVLNQLCVLHEK           | 3+ | 840.1960 |            | 68  | U              |
|                                                                             | CCTESLVNR                       | 2+ | 569.819  |            | 40  | U              |
|                                                                             | RPCFSALEVDETYVPK                | 3+ | 637.765  |            | 53  | U              |
|                                                                             | QTALVELVK                       | 2+ | 500.924  |            | 47  | U              |
|                                                                             | AVMDDFAAFVEK                    | 2+ | 671.965  |            | 74  | U              |
|                                                                             | LVAASQAALGL                     | 2+ | 507.390  |            | 49  | U              |
| Ig kappa chain C region (AOA087X130; prot.score:633; #pep.:6; seq.cov.:40%) | LLIYGASTR                       | 2+ | 497.377  |            | 58  | U              |
|                                                                             | TVAAPSVFIFPPSDEQLK              | 2+ | 973.635  |            | 50  | U              |



|                                                                                 |                      |    |          |  |    |                           |
|---------------------------------------------------------------------------------|----------------------|----|----------|--|----|---------------------------|
|                                                                                 | SGTASVVCLLNNFYPR     | 2+ | 899.592  |  | 57 | U                         |
|                                                                                 | VDNALQSGNSQESVTEQDSK | 2+ | 1069.035 |  | 99 | U                         |
|                                                                                 | DSTYLSSTLTLSK        | 2+ | 751.948  |  | 64 | U                         |
|                                                                                 | VYACEVTHQGLSSPVTK    | 2+ | 939.067  |  | 56 | U                         |
| Ig lambda-2 chain C regions (A0A075B6K9; prot.score:440; #pep.:5; seq.cov.:63%) | AAPSVTLFPPSSEELQANK  | 2+ | 993.587  |  | 50 | U                         |
|                                                                                 | AGVETTTPSK           | 2+ | 495.862  |  | 62 | U                         |
|                                                                                 | YAASSYLSLTPEQWK      | 2+ | 872.548  |  | 57 | U                         |
|                                                                                 | SYSCQVTHEGSTVEK      | 2+ | 856.471  |  | 69 | U                         |
|                                                                                 | TVAPTECS             | 2+ | 432.760  |  | 35 | U                         |
| Ig mu chain C region (A0A087X2C0; prot.score:178; #pep.:6; seq.cov.:11%)        | AEDTAVYYCAR          | 2+ | 659.877  |  | 71 | A0A087WSX4;<br>A0A087WV47 |
|                                                                                 | YAATSQVLLPSK         | 2+ | 639.422  |  | 44 | U                         |
|                                                                                 | VSVFVPPR             | 2+ | 450.861  |  | 41 | U                         |
|                                                                                 | QVGSGVTTDQVQAEAK     | 2+ | 809.466  |  | 73 | U                         |
|                                                                                 | ESGPTTYK             | 2+ | 441.819  |  | 31 | U                         |
|                                                                                 | YVTSAPMPEPQAPGR      | 2+ | 800.911  |  | 36 | U                         |
| Protein IGHV3-53 (A0A087WSX4; prot.score:104; #pep.:2; seq.cov.:18%)            | NTRYLQMNLSLR         | 2+ | 677.012  |  | 54 | U                         |
|                                                                                 | AEDTAVYYCAR          | 2+ | 659.877  |  | 71 | A0A087X2C0;<br>A0A087WV47 |
| Ig gamma-1 chain C region (A0A087WV47; prot.score:96; #pep.:5; seq.cov.:13%)    | AEDTAVYYCAR          | 2+ | 659.877  |  | 71 | A0A087X2C0;<br>A0A087WV47 |
|                                                                                 | DTLMISR              | 2+ | 418.280  |  | 37 |                           |
|                                                                                 | TPEVTCVVVDVSHEDPEVK  | 3+ | 713.777  |  | 34 | U                         |
|                                                                                 | FNWYVDGVEVHNAK       | 3+ | 560.040  |  | 48 | U                         |
|                                                                                 | NQVSLTCLVK           | 2+ | 581.422  |  | 41 | A0A075B6N8                |
| Ig gamma-3 chain C region (A0A075B6N8; prot.score:51; #pep.:3; seq.cov.:7%)     | SCDTPPPCPR           | 2+ | 593.816  |  | 43 | U                         |
|                                                                                 | DTLMISR              | 2+ | 418.280  |  | 37 |                           |
|                                                                                 | NQVSLTCLVK           | 2+ | 581.422  |  | 41 | A0A087WV47                |
| Ig kappa chain V-I region DEE (P01597; prot.score:120; #pep.:2; seq.cov.:16%)   | NIQMTQSPSSLSASVGDR   | 3+ | 627.073  |  | 50 | U                         |

|                                                                                |                        |    |         |  |    |   |
|--------------------------------------------------------------------------------|------------------------|----|---------|--|----|---|
|                                                                                | DIQMTQSPSSLSASVGDR     | 2+ | 940.011 |  | 89 | U |
| Protein AMBP (P02760; prot.score:93; #pep.:2; seq.cov.:5%)                     | GVCEETSGAYEK           | 2+ | 665.411 |  | 67 | U |
|                                                                                | ETLLQDFR               | 2+ | 511.360 |  | 52 | U |
| Complement C3 (P01024; prot.score:85; #pep.:3; seq.cov.:3%)                    | VPVAVQGEDTVQSLTQGDGVAK | 3+ | 733.528 |  | 50 | U |
|                                                                                | ILLQGTPVAQMTEDAVIDAER  | 3+ | 719.835 |  | 48 | U |
|                                                                                | GYTQQLAFR              | 2+ | 542.379 |  | 35 | U |
| Alpha-1-antitrypsin (P01009; prot.score:62; #pep.:4; seq.cov.:10%)             | LQHLENELTHDIITK        | 3+ | 602.085 |  | 53 | U |
|                                                                                | LSITGTYDLK             | 2+ | 555.895 |  | 33 | U |
|                                                                                | SVLGQLGITK             | 2+ | 508.383 |  | 41 | U |
|                                                                                | AVLTIDEK               | 2+ | 444.836 |  | 31 | U |
| Ig heavy chain V-III region TUR (P01779; prot.score:62; #pep.:2; seq.cov.:26%) | EVQLLESGGGLVQPGGSLR    | 3+ | 632.795 |  | 43 | U |
|                                                                                | LSCAASGFTFSR           | 2+ | 652.428 |  | 50 | U |
| Protein IGHV4-34 (fragment) (A0A0A0MS12; prot.score:51; #pep.:2; seq.cov.:20%) | VTISVDTSK              | 2+ | 475.309 |  | 34 | U |
|                                                                                | LSSVTAADTAVYYCAR       | 2+ | 874.544 |  | 48 | U |

**Supplementary Table S2:** Information gathered from RP-LC-ESI-QTOF-MS/MS analysis of tryptic IgA N-glycopeptides (A) and ESI-FTICR-MS/MS analysis of the tryptic O-glycopeptide bearing H4N4S2 (B). Parent masses for the fragmentations are indicated bold; the ions for B are derived from two overlapping fragmentation spectra. For the O-glycopeptide only compositional confirmation is obtained; glycosylation sites are obtained from literature. Abbreviations: N, N-acetylhexosamine; H, hexose; F, fucose; S, N-acetylneuraminic acid; Pep, peptide.

| Peptide sequence                                        | Glycosylation site                                                 | Calculated peptide mass [M]                    | Glycan composition | Observed m/z                                        | Mass difference [ppm]     | Observed m/z for pep+GlcNAc [M+2H] <sup>2+</sup> | Mass difference [ppm]     | Observed diagnostic ions                                                                                                                                                                                                                                                                                                                                                                                                                                                                                                                                                                                                                                                                                                                                                                                                                             |                                                                                                                                                                                                                                                                                                                                                                                                                                                                                                                                                                                                                                                                                                                                                                                                                                                                                                                                                                                                                                                                                                                                                                                                                                                                                                                                                                                                                                                                                                                                                                                                                |           |                                                                                                                                                                                                                                                                                                                                                                                                                                                                                                                                                                                                                                                                                                                                                                                                                                                                                              |                                                                                                                                                                                                                                                                                                                                                                                                                                                                                                                                                                                                                                                                                                                                                                                                                                                          |
|---------------------------------------------------------|--------------------------------------------------------------------|------------------------------------------------|--------------------|-----------------------------------------------------|---------------------------|--------------------------------------------------|---------------------------|------------------------------------------------------------------------------------------------------------------------------------------------------------------------------------------------------------------------------------------------------------------------------------------------------------------------------------------------------------------------------------------------------------------------------------------------------------------------------------------------------------------------------------------------------------------------------------------------------------------------------------------------------------------------------------------------------------------------------------------------------------------------------------------------------------------------------------------------------|----------------------------------------------------------------------------------------------------------------------------------------------------------------------------------------------------------------------------------------------------------------------------------------------------------------------------------------------------------------------------------------------------------------------------------------------------------------------------------------------------------------------------------------------------------------------------------------------------------------------------------------------------------------------------------------------------------------------------------------------------------------------------------------------------------------------------------------------------------------------------------------------------------------------------------------------------------------------------------------------------------------------------------------------------------------------------------------------------------------------------------------------------------------------------------------------------------------------------------------------------------------------------------------------------------------------------------------------------------------------------------------------------------------------------------------------------------------------------------------------------------------------------------------------------------------------------------------------------------------|-----------|----------------------------------------------------------------------------------------------------------------------------------------------------------------------------------------------------------------------------------------------------------------------------------------------------------------------------------------------------------------------------------------------------------------------------------------------------------------------------------------------------------------------------------------------------------------------------------------------------------------------------------------------------------------------------------------------------------------------------------------------------------------------------------------------------------------------------------------------------------------------------------------------|----------------------------------------------------------------------------------------------------------------------------------------------------------------------------------------------------------------------------------------------------------------------------------------------------------------------------------------------------------------------------------------------------------------------------------------------------------------------------------------------------------------------------------------------------------------------------------------------------------------------------------------------------------------------------------------------------------------------------------------------------------------------------------------------------------------------------------------------------------|
| A                                                       | <sup>332</sup> LAGKPTHVNVSVWM(ox)AEVDGTC <sub>353</sub>            | Asn340                                         | 2362.1298          | H5N4F1S2                                            | [1571.9857] <sup>3+</sup> | 5.2                                              |                           | b4 370.2418; b5 467.2937; b6 568.3425; b7 705.3995; b8 804.4676; b9 918.5113; b10 1017.5799; b11 1104.6096; b12 1203.6798; b13 1302.7455; y2 342.1092; y5 615.2051; y6 714.2715; y7 843.3163; y8 914.3534; y9 1061.3868; y10 1160.4547; N 204.0847; S-H2O 274.0898; S 292.1002; H1N1 366.1365; H2N1 528.1884; H1N1S1 657.2311; H3N1 690.2414; Pep+N1 <sup>2+</sup> 1283.6066; Pep+N1F1 <sup>2+</sup> 1356.6353; Pep+N2 <sup>2+</sup> 1385.1452; Pep+N2F1 <sup>2+</sup> 1458.1719; Pep+H1N2 <sup>2+</sup> 1466.1725; Pep+H1N2F1 <sup>2+</sup> 1539.1982; Pep+H2N2 <sup>2+</sup> 1547.1968; Pep+H2N2F1 <sup>2+</sup> 1620.2260; Pep+H3N2F1 <sup>2+</sup> 1701.2510; Pep+H2N3F1 <sup>2+</sup> 1721.7628; Pep+H3N3 <sup>2+</sup> 1729.7623; Pep+H3N3F1 <sup>2+</sup> 1802.7926; Pep+H4N3F1 <sup>2+</sup> 1883.8169; Pep+H4N3F1S1 <sup>2+</sup> 2029.3674 |                                                                                                                                                                                                                                                                                                                                                                                                                                                                                                                                                                                                                                                                                                                                                                                                                                                                                                                                                                                                                                                                                                                                                                                                                                                                                                                                                                                                                                                                                                                                                                                                                |           |                                                                                                                                                                                                                                                                                                                                                                                                                                                                                                                                                                                                                                                                                                                                                                                                                                                                                              |                                                                                                                                                                                                                                                                                                                                                                                                                                                                                                                                                                                                                                                                                                                                                                                                                                                          |
|                                                         |                                                                    |                                                |                    |                                                     | [1179.2420] <sup>4+</sup> | 4.5                                              | 1283.6069                 | 3.9                                                                                                                                                                                                                                                                                                                                                                                                                                                                                                                                                                                                                                                                                                                                                                                                                                                  |                                                                                                                                                                                                                                                                                                                                                                                                                                                                                                                                                                                                                                                                                                                                                                                                                                                                                                                                                                                                                                                                                                                                                                                                                                                                                                                                                                                                                                                                                                                                                                                                                |           |                                                                                                                                                                                                                                                                                                                                                                                                                                                                                                                                                                                                                                                                                                                                                                                                                                                                                              |                                                                                                                                                                                                                                                                                                                                                                                                                                                                                                                                                                                                                                                                                                                                                                                                                                                          |
|                                                         |                                                                    |                                                |                    |                                                     | [943.5947] <sup>5+</sup>  | 4.9                                              |                           |                                                                                                                                                                                                                                                                                                                                                                                                                                                                                                                                                                                                                                                                                                                                                                                                                                                      |                                                                                                                                                                                                                                                                                                                                                                                                                                                                                                                                                                                                                                                                                                                                                                                                                                                                                                                                                                                                                                                                                                                                                                                                                                                                                                                                                                                                                                                                                                                                                                                                                |           |                                                                                                                                                                                                                                                                                                                                                                                                                                                                                                                                                                                                                                                                                                                                                                                                                                                                                              |                                                                                                                                                                                                                                                                                                                                                                                                                                                                                                                                                                                                                                                                                                                                                                                                                                                          |
|                                                         |                                                                    |                                                |                    |                                                     | [786.4967] <sup>6+</sup>  | 5                                                |                           |                                                                                                                                                                                                                                                                                                                                                                                                                                                                                                                                                                                                                                                                                                                                                                                                                                                      |                                                                                                                                                                                                                                                                                                                                                                                                                                                                                                                                                                                                                                                                                                                                                                                                                                                                                                                                                                                                                                                                                                                                                                                                                                                                                                                                                                                                                                                                                                                                                                                                                |           |                                                                                                                                                                                                                                                                                                                                                                                                                                                                                                                                                                                                                                                                                                                                                                                                                                                                                              |                                                                                                                                                                                                                                                                                                                                                                                                                                                                                                                                                                                                                                                                                                                                                                                                                                                          |
|                                                         |                                                                    |                                                |                    | H5N5F1S2                                            | [1230.0120] <sup>4+</sup> | 4.2                                              |                           |                                                                                                                                                                                                                                                                                                                                                                                                                                                                                                                                                                                                                                                                                                                                                                                                                                                      |                                                                                                                                                                                                                                                                                                                                                                                                                                                                                                                                                                                                                                                                                                                                                                                                                                                                                                                                                                                                                                                                                                                                                                                                                                                                                                                                                                                                                                                                                                                                                                                                                |           |                                                                                                                                                                                                                                                                                                                                                                                                                                                                                                                                                                                                                                                                                                                                                                                                                                                                                              |                                                                                                                                                                                                                                                                                                                                                                                                                                                                                                                                                                                                                                                                                                                                                                                                                                                          |
|                                                         |                                                                    |                                                |                    |                                                     | [984.2106] <sup>5+</sup>  | 4.6                                              | 1283.6066                 | 4.1                                                                                                                                                                                                                                                                                                                                                                                                                                                                                                                                                                                                                                                                                                                                                                                                                                                  |                                                                                                                                                                                                                                                                                                                                                                                                                                                                                                                                                                                                                                                                                                                                                                                                                                                                                                                                                                                                                                                                                                                                                                                                                                                                                                                                                                                                                                                                                                                                                                                                                |           |                                                                                                                                                                                                                                                                                                                                                                                                                                                                                                                                                                                                                                                                                                                                                                                                                                                                                              |                                                                                                                                                                                                                                                                                                                                                                                                                                                                                                                                                                                                                                                                                                                                                                                                                                                          |
|                                                         |                                                                    |                                                |                    |                                                     |                           | 4.4                                              |                           |                                                                                                                                                                                                                                                                                                                                                                                                                                                                                                                                                                                                                                                                                                                                                                                                                                                      |                                                                                                                                                                                                                                                                                                                                                                                                                                                                                                                                                                                                                                                                                                                                                                                                                                                                                                                                                                                                                                                                                                                                                                                                                                                                                                                                                                                                                                                                                                                                                                                                                |           |                                                                                                                                                                                                                                                                                                                                                                                                                                                                                                                                                                                                                                                                                                                                                                                                                                                                                              |                                                                                                                                                                                                                                                                                                                                                                                                                                                                                                                                                                                                                                                                                                                                                                                                                                                          |
|                                                         |                                                                    |                                                |                    |                                                     | [820.3436] <sup>6+</sup>  |                                                  |                           |                                                                                                                                                                                                                                                                                                                                                                                                                                                                                                                                                                                                                                                                                                                                                                                                                                                      |                                                                                                                                                                                                                                                                                                                                                                                                                                                                                                                                                                                                                                                                                                                                                                                                                                                                                                                                                                                                                                                                                                                                                                                                                                                                                                                                                                                                                                                                                                                                                                                                                |           |                                                                                                                                                                                                                                                                                                                                                                                                                                                                                                                                                                                                                                                                                                                                                                                                                                                                                              |                                                                                                                                                                                                                                                                                                                                                                                                                                                                                                                                                                                                                                                                                                                                                                                                                                                          |
|                                                         |                                                                    |                                                |                    | <sup>332</sup> LAGKPTHVNVSVVMAEVDGTC <sub>352</sub> | Asn340                    | 2183.0715                                        | H5N4F1S2                  | [1512.3168] <sup>3+</sup>                                                                                                                                                                                                                                                                                                                                                                                                                                                                                                                                                                                                                                                                                                                                                                                                                            | 6                                                                                                                                                                                                                                                                                                                                                                                                                                                                                                                                                                                                                                                                                                                                                                                                                                                                                                                                                                                                                                                                                                                                                                                                                                                                                                                                                                                                                                                                                                                                                                                                              |           |                                                                                                                                                                                                                                                                                                                                                                                                                                                                                                                                                                                                                                                                                                                                                                                                                                                                                              | b4 370.2476; b5 467.3015; b6 568.3499; b7 705.4082; b8 804.4787; b9 918.5197; b10 1017.5927; b11 1104.6243; b12 1203.6915; b13 1302.7589; y21 2184.0925; N 204.0886; S-H2O 274.0946; S 292.1052; H1N1 366.1428; H2N1 528.1961; H1N1S1 657.2399; H3N1 690.2509; H2N1S1 819.2920; Pep+N1 <sup>2+</sup> 1194.0899; Pep+N1F1 <sup>2+</sup> 1267.1202; Pep+N2 <sup>2+</sup> 1295.6288; Pep+H1N2 <sup>2+</sup> 1376.6575; Pep+N2F1 <sup>2+</sup> 1368.6594; Pep+H1N2F1 <sup>2+</sup> 1449.6880; Pep+H2N2 <sup>2+</sup> 1457.6858; Pep+H2N2F1 <sup>2+</sup> 1530.7136; Pep+H3N2 <sup>2+</sup> 1538.7104; Pep+H2N3 <sup>2+</sup> 1559.2318; Pep+H3N2F1 <sup>2+</sup> 1611.7409; Pep+H3N3 <sup>2+</sup> 1640.2526; Pep+H3N3F1 <sup>2+</sup> 1713.2818; Pep+H4N3 <sup>2+</sup> 1721.2785; Pep+H4N3F1 <sup>2+</sup> 1794.3054; Pep+N1 2387.1724; Pep+N1F1 2533.2282 |
|                                                         |                                                                    |                                                |                    |                                                     |                           |                                                  |                           | [1134.4899] <sup>4+</sup>                                                                                                                                                                                                                                                                                                                                                                                                                                                                                                                                                                                                                                                                                                                                                                                                                            | 6.3                                                                                                                                                                                                                                                                                                                                                                                                                                                                                                                                                                                                                                                                                                                                                                                                                                                                                                                                                                                                                                                                                                                                                                                                                                                                                                                                                                                                                                                                                                                                                                                                            | 1194.0899 | 6                                                                                                                                                                                                                                                                                                                                                                                                                                                                                                                                                                                                                                                                                                                                                                                                                                                                                            |                                                                                                                                                                                                                                                                                                                                                                                                                                                                                                                                                                                                                                                                                                                                                                                                                                                          |
| [907.7938] <sup>5+</sup>                                | 6.8                                                                |                                                |                    |                                                     |                           |                                                  |                           |                                                                                                                                                                                                                                                                                                                                                                                                                                                                                                                                                                                                                                                                                                                                                                                                                                                      |                                                                                                                                                                                                                                                                                                                                                                                                                                                                                                                                                                                                                                                                                                                                                                                                                                                                                                                                                                                                                                                                                                                                                                                                                                                                                                                                                                                                                                                                                                                                                                                                                |           |                                                                                                                                                                                                                                                                                                                                                                                                                                                                                                                                                                                                                                                                                                                                                                                                                                                                                              |                                                                                                                                                                                                                                                                                                                                                                                                                                                                                                                                                                                                                                                                                                                                                                                                                                                          |
|                                                         |                                                                    |                                                |                    |                                                     |                           |                                                  |                           |                                                                                                                                                                                                                                                                                                                                                                                                                                                                                                                                                                                                                                                                                                                                                                                                                                                      |                                                                                                                                                                                                                                                                                                                                                                                                                                                                                                                                                                                                                                                                                                                                                                                                                                                                                                                                                                                                                                                                                                                                                                                                                                                                                                                                                                                                                                                                                                                                                                                                                |           |                                                                                                                                                                                                                                                                                                                                                                                                                                                                                                                                                                                                                                                                                                                                                                                                                                                                                              |                                                                                                                                                                                                                                                                                                                                                                                                                                                                                                                                                                                                                                                                                                                                                                                                                                                          |
| H5N5F1S2                                                | [1185.2604] <sup>4+</sup>                                          | 6.6                                            |                    |                                                     |                           |                                                  |                           |                                                                                                                                                                                                                                                                                                                                                                                                                                                                                                                                                                                                                                                                                                                                                                                                                                                      |                                                                                                                                                                                                                                                                                                                                                                                                                                                                                                                                                                                                                                                                                                                                                                                                                                                                                                                                                                                                                                                                                                                                                                                                                                                                                                                                                                                                                                                                                                                                                                                                                |           |                                                                                                                                                                                                                                                                                                                                                                                                                                                                                                                                                                                                                                                                                                                                                                                                                                                                                              |                                                                                                                                                                                                                                                                                                                                                                                                                                                                                                                                                                                                                                                                                                                                                                                                                                                          |
|                                                         |                                                                    | 6.2                                            | 1194.0897          |                                                     |                           |                                                  | 5.8                       |                                                                                                                                                                                                                                                                                                                                                                                                                                                                                                                                                                                                                                                                                                                                                                                                                                                      |                                                                                                                                                                                                                                                                                                                                                                                                                                                                                                                                                                                                                                                                                                                                                                                                                                                                                                                                                                                                                                                                                                                                                                                                                                                                                                                                                                                                                                                                                                                                                                                                                |           |                                                                                                                                                                                                                                                                                                                                                                                                                                                                                                                                                                                                                                                                                                                                                                                                                                                                                              |                                                                                                                                                                                                                                                                                                                                                                                                                                                                                                                                                                                                                                                                                                                                                                                                                                                          |
|                                                         | [948.4094] <sup>5+</sup>                                           |                                                |                    |                                                     |                           |                                                  |                           |                                                                                                                                                                                                                                                                                                                                                                                                                                                                                                                                                                                                                                                                                                                                                                                                                                                      |                                                                                                                                                                                                                                                                                                                                                                                                                                                                                                                                                                                                                                                                                                                                                                                                                                                                                                                                                                                                                                                                                                                                                                                                                                                                                                                                                                                                                                                                                                                                                                                                                |           |                                                                                                                                                                                                                                                                                                                                                                                                                                                                                                                                                                                                                                                                                                                                                                                                                                                                                              |                                                                                                                                                                                                                                                                                                                                                                                                                                                                                                                                                                                                                                                                                                                                                                                                                                                          |
|                                                         |                                                                    |                                                |                    |                                                     |                           |                                                  |                           |                                                                                                                                                                                                                                                                                                                                                                                                                                                                                                                                                                                                                                                                                                                                                                                                                                                      |                                                                                                                                                                                                                                                                                                                                                                                                                                                                                                                                                                                                                                                                                                                                                                                                                                                                                                                                                                                                                                                                                                                                                                                                                                                                                                                                                                                                                                                                                                                                                                                                                |           |                                                                                                                                                                                                                                                                                                                                                                                                                                                                                                                                                                                                                                                                                                                                                                                                                                                                                              |                                                                                                                                                                                                                                                                                                                                                                                                                                                                                                                                                                                                                                                                                                                                                                                                                                                          |
| <sup>332</sup> LAGKPTHVNVSVVM(ox)AEVDGTC <sub>352</sub> | Asn340                                                             | 2199.0664                                      | H5N4F1S2           |                                                     |                           |                                                  | [1517.6478] <sup>3+</sup> | 5.5                                                                                                                                                                                                                                                                                                                                                                                                                                                                                                                                                                                                                                                                                                                                                                                                                                                  |                                                                                                                                                                                                                                                                                                                                                                                                                                                                                                                                                                                                                                                                                                                                                                                                                                                                                                                                                                                                                                                                                                                                                                                                                                                                                                                                                                                                                                                                                                                                                                                                                |           | b4 370.2476; b5 467.3013; b6 568.3496; b7 705.4087; b8 804.4785; b9 918.5209; b10 1017.5905; b11 1104.6243; b12 1203.6910; b13 1302.7608; b14 1449.7906; y2 280.0988; y3 337.1203; y4 452.1477; y5 551.2172; y6 680.2606; y7 751.2970; y8 898.3343; y9 997.4039; N 204.0888; S-H2O 274.0948; S 292.1052; H1N1 366.1428; H2N1 528.1959; H1N1S1 657.2396; H3N1 690.2499; H2N1S1 819.2943; Pep+N1 <sup>2+</sup> 1202.0883; Pep+N1F1 <sup>2+</sup> 1275.1179; Pep+N2 <sup>2+</sup> 1303.6285; Pep+N2F1 <sup>2+</sup> 1376.6566; Pep+H1N2 <sup>2+</sup> 1384.6553; Pep+H1N2F1 <sup>2+</sup> 1457.6820; Pep+H2N2 <sup>2+</sup> 1465.6820; Pep+H2N2F1 <sup>2+</sup> 1538.7112; Pep+H3N2 <sup>2+</sup> 1546.7095; Pep+H3N2F1 <sup>2+</sup> 1619.7389; Pep+H3N3 <sup>2+</sup> 1648.2491; Pep+H3N3F1 <sup>2+</sup> 1721.2786; Pep+H4N3F1 <sup>2+</sup> 1802.3061; Pep+N1 2403.1650; Pep+N1F1 2549.2251 |                                                                                                                                                                                                                                                                                                                                                                                                                                                                                                                                                                                                                                                                                                                                                                                                                                                          |
|                                                         |                                                                    |                                                |                    |                                                     |                           |                                                  | [1138.4891] <sup>4+</sup> | 6.7                                                                                                                                                                                                                                                                                                                                                                                                                                                                                                                                                                                                                                                                                                                                                                                                                                                  | 1202.0883                                                                                                                                                                                                                                                                                                                                                                                                                                                                                                                                                                                                                                                                                                                                                                                                                                                                                                                                                                                                                                                                                                                                                                                                                                                                                                                                                                                                                                                                                                                                                                                                      | 6.8       |                                                                                                                                                                                                                                                                                                                                                                                                                                                                                                                                                                                                                                                                                                                                                                                                                                                                                              |                                                                                                                                                                                                                                                                                                                                                                                                                                                                                                                                                                                                                                                                                                                                                                                                                                                          |
|                                                         |                                                                    |                                                |                    | [910.9927] <sup>5+</sup>                            | 6.7                       |                                                  |                           |                                                                                                                                                                                                                                                                                                                                                                                                                                                                                                                                                                                                                                                                                                                                                                                                                                                      |                                                                                                                                                                                                                                                                                                                                                                                                                                                                                                                                                                                                                                                                                                                                                                                                                                                                                                                                                                                                                                                                                                                                                                                                                                                                                                                                                                                                                                                                                                                                                                                                                |           |                                                                                                                                                                                                                                                                                                                                                                                                                                                                                                                                                                                                                                                                                                                                                                                                                                                                                              |                                                                                                                                                                                                                                                                                                                                                                                                                                                                                                                                                                                                                                                                                                                                                                                                                                                          |
|                                                         |                                                                    |                                                |                    | [759.3281] <sup>6+</sup>                            | 6.2                       |                                                  |                           |                                                                                                                                                                                                                                                                                                                                                                                                                                                                                                                                                                                                                                                                                                                                                                                                                                                      |                                                                                                                                                                                                                                                                                                                                                                                                                                                                                                                                                                                                                                                                                                                                                                                                                                                                                                                                                                                                                                                                                                                                                                                                                                                                                                                                                                                                                                                                                                                                                                                                                |           |                                                                                                                                                                                                                                                                                                                                                                                                                                                                                                                                                                                                                                                                                                                                                                                                                                                                                              |                                                                                                                                                                                                                                                                                                                                                                                                                                                                                                                                                                                                                                                                                                                                                                                                                                                          |
|                                                         |                                                                    |                                                |                    |                                                     |                           |                                                  |                           |                                                                                                                                                                                                                                                                                                                                                                                                                                                                                                                                                                                                                                                                                                                                                                                                                                                      |                                                                                                                                                                                                                                                                                                                                                                                                                                                                                                                                                                                                                                                                                                                                                                                                                                                                                                                                                                                                                                                                                                                                                                                                                                                                                                                                                                                                                                                                                                                                                                                                                |           |                                                                                                                                                                                                                                                                                                                                                                                                                                                                                                                                                                                                                                                                                                                                                                                                                                                                                              |                                                                                                                                                                                                                                                                                                                                                                                                                                                                                                                                                                                                                                                                                                                                                                                                                                                          |
| B                                                       | <sup>89</sup> HYTNPSQDVTVPCVPSTPTPTSPSTPTPTSPSCCHPR <sub>126</sub> | Thr106, Thr109, Ser111, Ser113, Thr114, Thr117 | 4135.8821          | H4N4S2                                              | [883.6648] <sup>7+</sup>  | 0.1                                              |                           |                                                                                                                                                                                                                                                                                                                                                                                                                                                                                                                                                                                                                                                                                                                                                                                                                                                      | b9 <sup>2+</sup> 521.7331; b15 <sup>3+</sup> 565.9314; b10 <sup>2+</sup> 572.2570; b11+H2O <sup>2+</sup> 612.7859; b11 <sup>2+</sup> 621.7911; b11 <sup>1+</sup> 1242.5753; N 204.0867; S+H2O 274.0921; S 292.1027; H1N1 366.1395; H1S1 454.1555; H2N1 528.1923; H1N1S1 657.2349; H2N1S1 819.2878; Pep+H4N4S1 <sup>7+</sup> 842.0795; Pep+H2N3 <sup>6+</sup> 845.8790; Pep+H3N3 <sup>5+</sup> 872.8876; Pep+H2N3S1 <sup>6+</sup> 894.3940; Pep+H3N4 <sup>6+</sup> 906.7340; Pep+H3N3S1 <sup>6+</sup> 921.4026; Pep+H1N2 <sup>5+</sup> 941.8263; Pep+H3N4S1 <sup>6+</sup> 955.2502; Pep+H3N3S2 <sup>5+</sup> 969.9182; Pep+H4N4S1 <sup>6+</sup> 982.4251; Pep+H1N2S1 <sup>5+</sup> 1000.0439; Pep+H2N3 <sup>5+</sup> 1014.8526; Pep+H2N2S1 <sup>5+</sup> 1032.4558; Pep+H3N3 <sup>5+</sup> 1047.2635; Pep+H2N3S1 <sup>5+</sup> 1073.0722; Pep+H3N4 <sup>5+</sup> 1088.0797; Pep+H3N3S1 <sup>5+</sup> 1105.4811; Pep+H3N4S1 <sup>5+</sup> 1146.0985; y27+H4N4S1 <sup>4+</sup> 1162.4935; Pep+H4N4S1 <sup>5+</sup> 1178.5083; Pep+H3N4S2 <sup>5+</sup> 1204.3177; Pep+H2N2 <sup>4+</sup> 1217.5453; Pep+H2N3 <sup>4+</sup> 1268.3147; y27+H2N3 <sup>3+</sup> 1276.8749; Pep+H3N3 <sup>4+</sup> 1308.8292; Pep+H2N3S1 <sup>4+</sup> 1341.0885; Pep+H3N4 <sup>4+</sup> 1359.6004; Pep+H3N3S1 <sup>4+</sup> 1381.6018; Pep+H4N4 <sup>4+</sup> 1400.1111; Pep+H4N3S1 <sup>4+</sup> 1422.1159; Pep+H3N4S1 <sup>4+</sup> 1432.3706; Pep+H3N3S2 <sup>4+</sup> 1454.3757; Pep+H4N4S1 <sup>4+</sup> 1472.8845; y27+H3N4S1 <sup>3+</sup> 1495.6380; y27+H4N4S1 <sup>3+</sup> 1549.6546; y27+H4N4S2 <sup>3+</sup> 1646.6873; |           |                                                                                                                                                                                                                                                                                                                                                                                                                                                                                                                                                                                                                                                                                                                                                                                                                                                                                              |                                                                                                                                                                                                                                                                                                                                                                                                                                                                                                                                                                                                                                                                                                                                                                                                                                                          |
|                                                         |                                                                    |                                                |                    |                                                     | [1030.7752] <sup>6+</sup> | 0.9                                              |                           |                                                                                                                                                                                                                                                                                                                                                                                                                                                                                                                                                                                                                                                                                                                                                                                                                                                      |                                                                                                                                                                                                                                                                                                                                                                                                                                                                                                                                                                                                                                                                                                                                                                                                                                                                                                                                                                                                                                                                                                                                                                                                                                                                                                                                                                                                                                                                                                                                                                                                                |           |                                                                                                                                                                                                                                                                                                                                                                                                                                                                                                                                                                                                                                                                                                                                                                                                                                                                                              |                                                                                                                                                                                                                                                                                                                                                                                                                                                                                                                                                                                                                                                                                                                                                                                                                                                          |
|                                                         |                                                                    |                                                |                    |                                                     | [1236.7270] <sup>5+</sup> | -0.6                                             |                           |                                                                                                                                                                                                                                                                                                                                                                                                                                                                                                                                                                                                                                                                                                                                                                                                                                                      |                                                                                                                                                                                                                                                                                                                                                                                                                                                                                                                                                                                                                                                                                                                                                                                                                                                                                                                                                                                                                                                                                                                                                                                                                                                                                                                                                                                                                                                                                                                                                                                                                |           |                                                                                                                                                                                                                                                                                                                                                                                                                                                                                                                                                                                                                                                                                                                                                                                                                                                                                              |                                                                                                                                                                                                                                                                                                                                                                                                                                                                                                                                                                                                                                                                                                                                                                                                                                                          |
|                                                         |                                                                    |                                                |                    |                                                     |                           |                                                  |                           |                                                                                                                                                                                                                                                                                                                                                                                                                                                                                                                                                                                                                                                                                                                                                                                                                                                      |                                                                                                                                                                                                                                                                                                                                                                                                                                                                                                                                                                                                                                                                                                                                                                                                                                                                                                                                                                                                                                                                                                                                                                                                                                                                                                                                                                                                                                                                                                                                                                                                                |           |                                                                                                                                                                                                                                                                                                                                                                                                                                                                                                                                                                                                                                                                                                                                                                                                                                                                                              |                                                                                                                                                                                                                                                                                                                                                                                                                                                                                                                                                                                                                                                                                                                                                                                                                                                          |

**Supplementary Table S3** Detected *N*-glycopeptides with the corresponding monoisotopic theoretical mass and median observed ppm error. Additionally literature references are shown if applicable. Abbreviations: H = hexose; N = *N*-acetylhexosamine; F = fucose; S = *N*-acetylneuraminic acid; n.d. = not detected.

|                        | <i>N</i> -glycan compositions | <i>m/z</i> | Error (ppm) | Literature |  | <i>N</i> -glycan compositions | <i>m/z</i> | Error (ppm) | Literature           |
|------------------------|-------------------------------|------------|-------------|------------|--|-------------------------------|------------|-------------|----------------------|
| Asn144                 | H5N4                          | 4586.1793  | -1.54       | (18)       |  | H5N4F1S1 <sup>a,b</sup>       | 4259.8080  | 1.40        |                      |
|                        | H5N4S1                        | 4877.2747  | -0.09       | (18)       |  | H5N4F1S2 <sup>b</sup>         | 4534.9086  | -0.70       | (18)                 |
|                        | H5N4S2                        | 5168.3702  | 1.45        | (18)       |  | H5N4F1S2 <sup>a,b</sup>       | 4550.9035  | -0.55       |                      |
|                        | H5N5                          | 4789.2587  | 0.69        | (18)       |  | H5N5S1                        | 4300.8346  | 1.01        |                      |
|                        | H5N5S1                        | 5080.3541  | -1.50       | (18)       |  | H5N5S1 <sup>a</sup>           | 4316.8295  | -1.08       |                      |
|                        | H5N5S2                        | 5371.4495  | 0.64        |            |  | H5N5S2                        | 4591.9300  | 0.64        |                      |
| Asn340<br>(non-trunc.) | H5N4F1S1 <sup>a</sup>         | 4422.8719  | 0.19        | (18)       |  | H5N5F1 <sup>a</sup>           | 4171.7920  | -1.68       | (12,18) <sup>c</sup> |
|                        | H5N4F1S2 <sup>a</sup>         | 4713.9673  | -1.59       | (18)       |  | H5N5F1S1                      | 4446.8925  | 2.14        | (18) <sup>c</sup>    |
|                        | H5N5F1S2 <sup>a,b</sup>       | 4917.0467  | -0.62       | (18)       |  | H5N5F1S1 <sup>a</sup>         | 4462.8874  | 1.84        |                      |
| Asn340<br>(trunc.)     | H4N4S1                        | 3935.7024  | -1.84       |            |  | H5N5F1S2 <sup>b</sup>         | 4737.9879  | -0.72       | (18)                 |
|                        | H5N4S1                        | 4097.7552  | -0.13       | (18)       |  | H5N5F1S2 <sup>a,b</sup>       | 4753.9828  | 0.43        |                      |
|                        | H5N4S1 <sup>a</sup>           | 4113.7501  | 0.17        |            |  | H6N5F1S1 <sup>a</sup>         | 4624.9402  | 3.65        |                      |
|                        | H5N4S2 <sup>a</sup>           | 4404.8456  | -0.90       |            |  | H6N5F1S3 <sup>a</sup>         | 5207.1311  | 1.10        | (18)                 |
|                        | H5N4F1 <sup>a</sup>           | 3968.7126  | -1.97       | (18)       |  | H6N6 <sup>a</sup>             | 4390.8663  | -0.11       |                      |
|                        | H5N4F1S1 <sup>b</sup>         | 4243.8131  | 0.16        | (18)       |  |                               |            |             |                      |

<sup>a</sup> Oxidized peptide

<sup>b</sup> 3rd isotopic peak used for calibration

<sup>c</sup> Only detected non-truncated

**Supplementary Table S4** Inter- and intraplate variation observed within a standard sample that was included at least in triplo on each plate. Variation was determined over the glycopeptides with relative abundance >1% (O glycopeptide, total >89%; Asn144, total 100%; Asn340, total 100%) or >2% (truncated Asn340, total >92%).

|            | Plate | O-glycopeptide | Asn144 | Asn340 | Asn340 (truncated) |
|------------|-------|----------------|--------|--------|--------------------|
| Intraplate | 1     | 13.4%          | 10.8%  | 4.4%   | 16.1%              |
|            | 2     | 17.9%          | 11.4%  | 8.9%   | 11.0%              |
| Interplate |       | 16.5%          | 11.3%  | 9.0%   | 18.7%              |

**Supplementary Table S5** Mean and standard error of the mean (SEM) of all calculated glycosylation traits at all six time points. Abbreviations: trim = trimester; wkpp = weeks postpartum; GalNAc = *N*-acetylgalactosamine; Gal = galactose; SA = sialic acid (*N*-acetylneuraminic acid); % = percentage relative abundance; # = number calculated based on relative abundance.

|                       |                             | 1 <sup>st</sup> trim |      | 2nd trim |      | 3rd trim |      | 6wkpp |      | 12wkpp |      | >26wkpp |      |
|-----------------------|-----------------------------|----------------------|------|----------|------|----------|------|-------|------|--------|------|---------|------|
|                       |                             | mean                 | SEM  | mean     | SEM  | mean     | SEM  | mean  | SEM  | mean   | SEM  | mean    | SEM  |
| Asn<br>144            | Sialylation (%)             | 61.39                | 0.96 | 62.89    | 0.83 | 63.12    | 0.90 | 59.08 | 1.05 | 59.23  | 0.98 | 59.07   | 0.80 |
|                       | Bisection (%)               | 25.47                | 0.72 | 26.16    | 0.80 | 27.20    | 0.90 | 28.47 | 0.88 | 27.67  | 0.97 | 26.85   | 0.72 |
| Asn<br>340            | Sialylation (%)             | 95.18                | 0.17 | 94.99    | 0.22 | 95.34    | 0.16 | 95.40 | 0.19 | 95.31  | 0.23 | 95.22   | 0.25 |
|                       | Bisection (%)               | 52.24                | 1.12 | 52.59    | 1.00 | 54.74    | 1.07 | 57.98 | 0.99 | 56.07  | 1.11 | 54.88   | 1.22 |
| Asn340<br>(truncated) | Galactosylation (%)         | 99.84                | 0.01 | 99.84    | 0.01 | 99.83    | 0.01 | 99.82 | 0.01 | 99.85  | 0.01 | 99.84   | 0.01 |
|                       | Sialylation (%)             | 89.56                | 0.21 | 89.28    | 0.28 | 89.12    | 0.19 | 89.26 | 0.23 | 89.21  | 0.27 | 89.25   | 0.27 |
|                       | Fucosylation (%)            | 92.94                | 0.35 | 92.40    | 0.31 | 92.26    | 0.36 | 92.90 | 0.35 | 92.95  | 0.32 | 93.38   | 0.26 |
|                       | Bisection (%)               | 51.76                | 1.04 | 52.67    | 1.03 | 53.87    | 1.00 | 58.45 | 1.03 | 56.86  | 1.19 | 55.36   | 0.94 |
|                       | Triantennary (%)            | 5.46                 | 0.26 | 6.36     | 0.41 | 6.10     | 0.28 | 5.40  | 0.29 | 5.60   | 0.30 | 5.24    | 0.25 |
| O-glycosylation       | GalNAc (#)                  | 4.81                 | 0.09 | 4.81     | 0.01 | 4.81     | 0.01 | 4.82  | 0.01 | 4.82   | 0.01 | 4.81    | 0.01 |
|                       | Gal (#)                     | 3.96                 | 0.02 | 3.96     | 0.02 | 3.98     | 0.02 | 3.99  | 0.01 | 3.98   | 0.02 | 3.99    | 0.01 |
|                       | SA (#)                      | 3.03                 | 0.03 | 3.03     | 0.04 | 3.02     | 0.03 | 3.04  | 0.02 | 3.08   | 0.03 | 3.05    | 0.03 |
|                       | SA per Gal                  | 0.77                 | 0.01 | 0.77     | 0.01 | 0.76     | 0.01 | 0.76  | 0.01 | 0.77   | 0.01 | 0.77    | 0.01 |
|                       | Gal per GalNAc              | 0.82                 | 0.00 | 0.82     | 0.00 | 0.83     | 0.00 | 0.83  | 0.00 | 0.83   | 0.00 | 0.83    | 0.00 |
|                       | SA>Gal (%) <sup>*</sup>     | 6.49                 | 0.43 | 6.90     | 0.43 | 6.79     | 0.36 | 6.69  | 0.30 | 7.18   | 0.39 | 6.59    | 0.31 |
|                       | GalNAc>Gal (%) <sup>†</sup> | 61.36                | 0.94 | 64.37    | 0.87 | 60.27    | 0.86 | 59.99 | 0.76 | 60.72  | 0.79 | 59.81   | 0.79 |
|                       | GalNAc>Gal (#) <sup>‡</sup> | 0.85                 | 0.02 | 0.85     | 0.02 | 0.83     | 0.02 | 0.82  | 0.01 | 0.83   | 0.01 | 0.82    | 0.01 |

\* The percentage of *O*-glycopeptides with more sialic acids than galactoses.

† The percentage of *O*-glycopeptides with more GalNAcs than galactoses, indicative for at least one Tn-antigen.

‡ The number of GalNAcs more than galactoses; e.g. 1 \* (relative abundance of H3N4) + 2 \* (relative abundance of H2N4) etc.

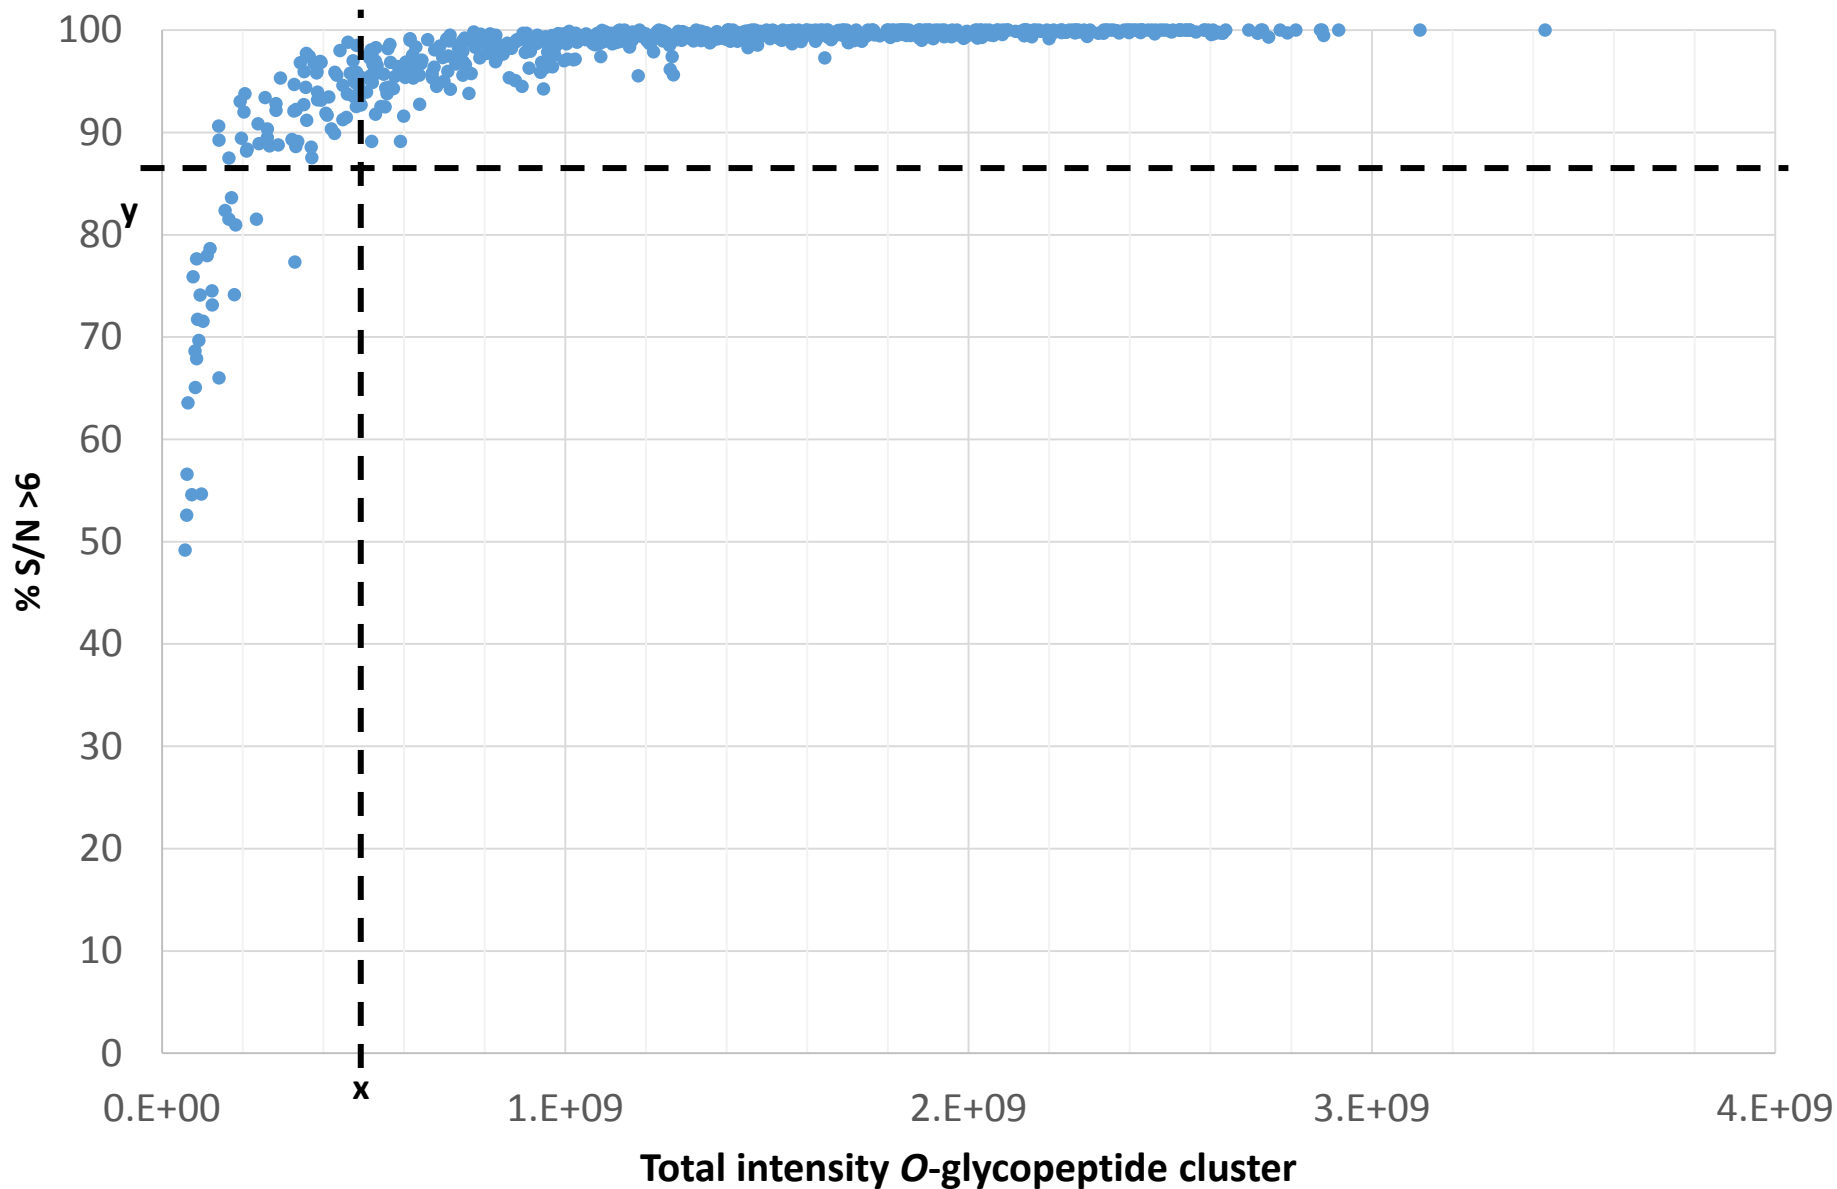

**Supplementary Figure S1** Example of the plots used to determine cut-off values for glycopeptide cluster intensity (x-axis) and the relative abundance of analytes with signal-to-noise greater than 6 within that cluster (y-axis)

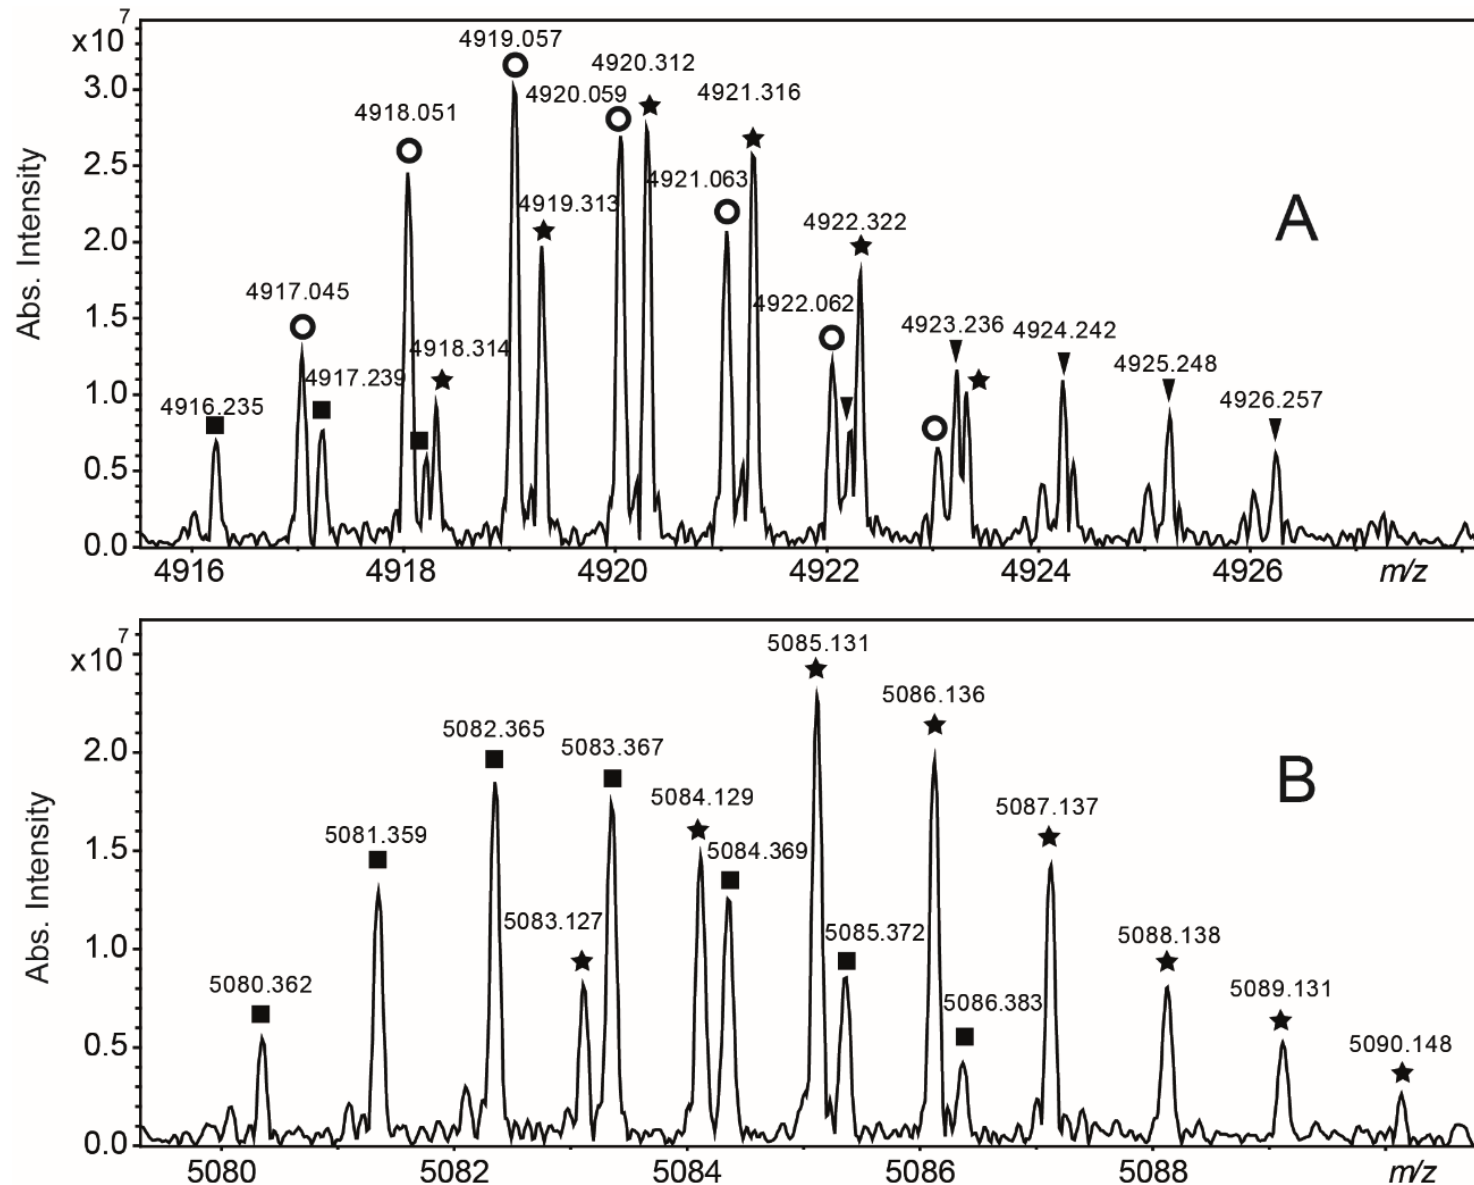

**Supplementary Figure S2** Enlargements of MALDI-FTICR-MS spectra obtained from the analysis of *N*- and *O*-glycopeptides from serum IgA. The ultrahigh resolving power allowed both the resolution of isotopic distributions from species with close nominal masses and the accurate quantification of the selected peptides in all the spectra. Examples are of **(A)** H5N5F1S2 on the oxidized and truncated Asn340 glycopeptide ( $m/z$  4917.047), and **(B)** H5N5S1 on Asn144 ( $m/z$  5080.354).



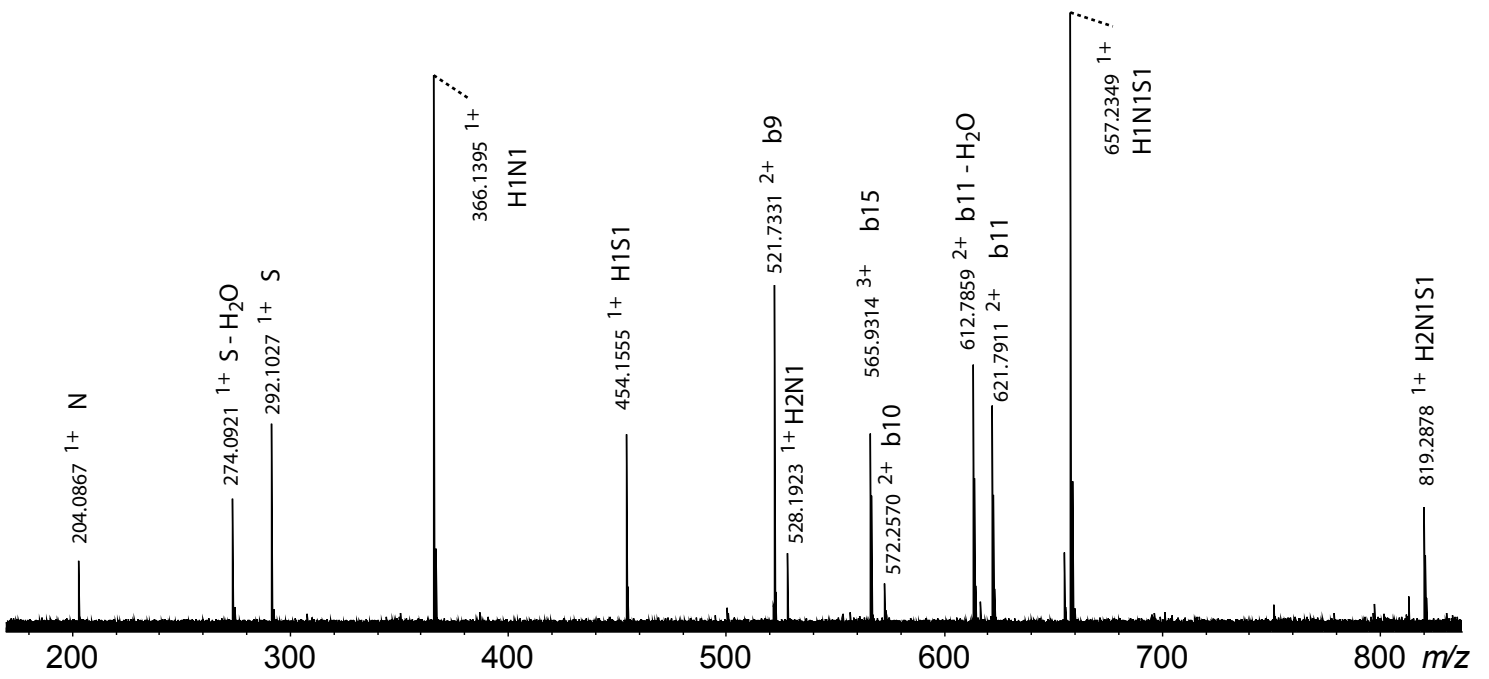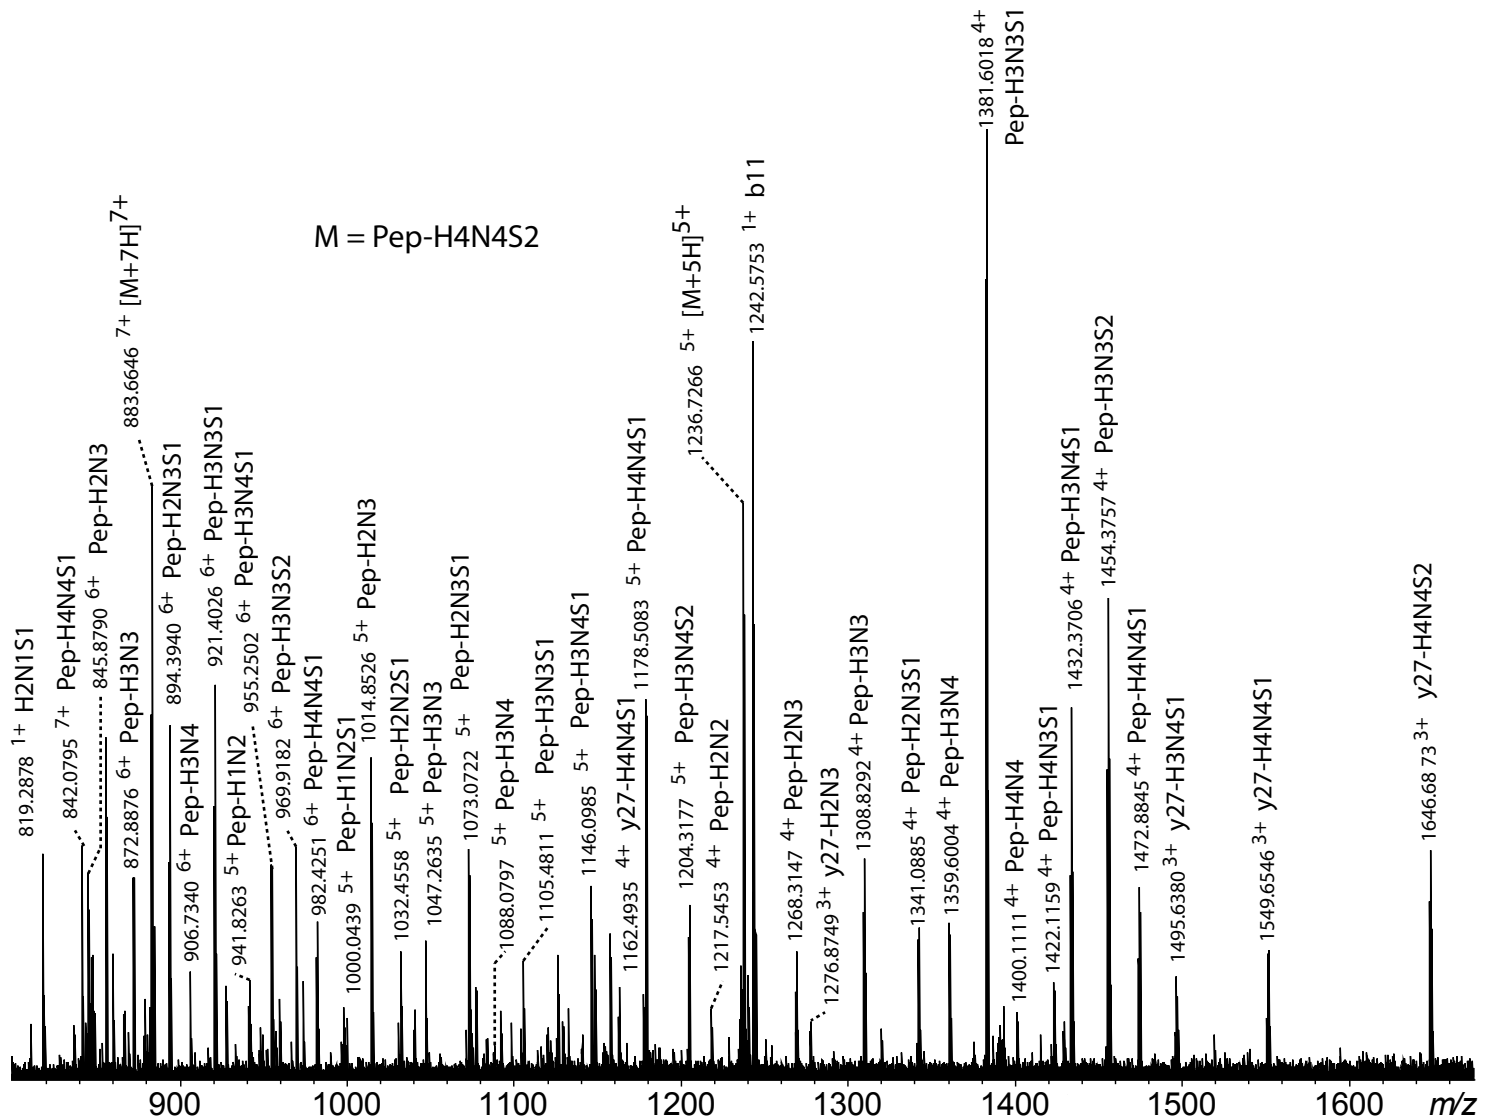

### Supplementary Figure S3

MS/MS confirmation by ESI-FTICR-MS/MS of the IgA hinge region *O*-glycopeptide carrying H4N4S2.

Abbreviations: H = hexose; N = *N*-acetylhexosamine; S = *N*-acetylneuraminic acid; Pep = peptide moiety.

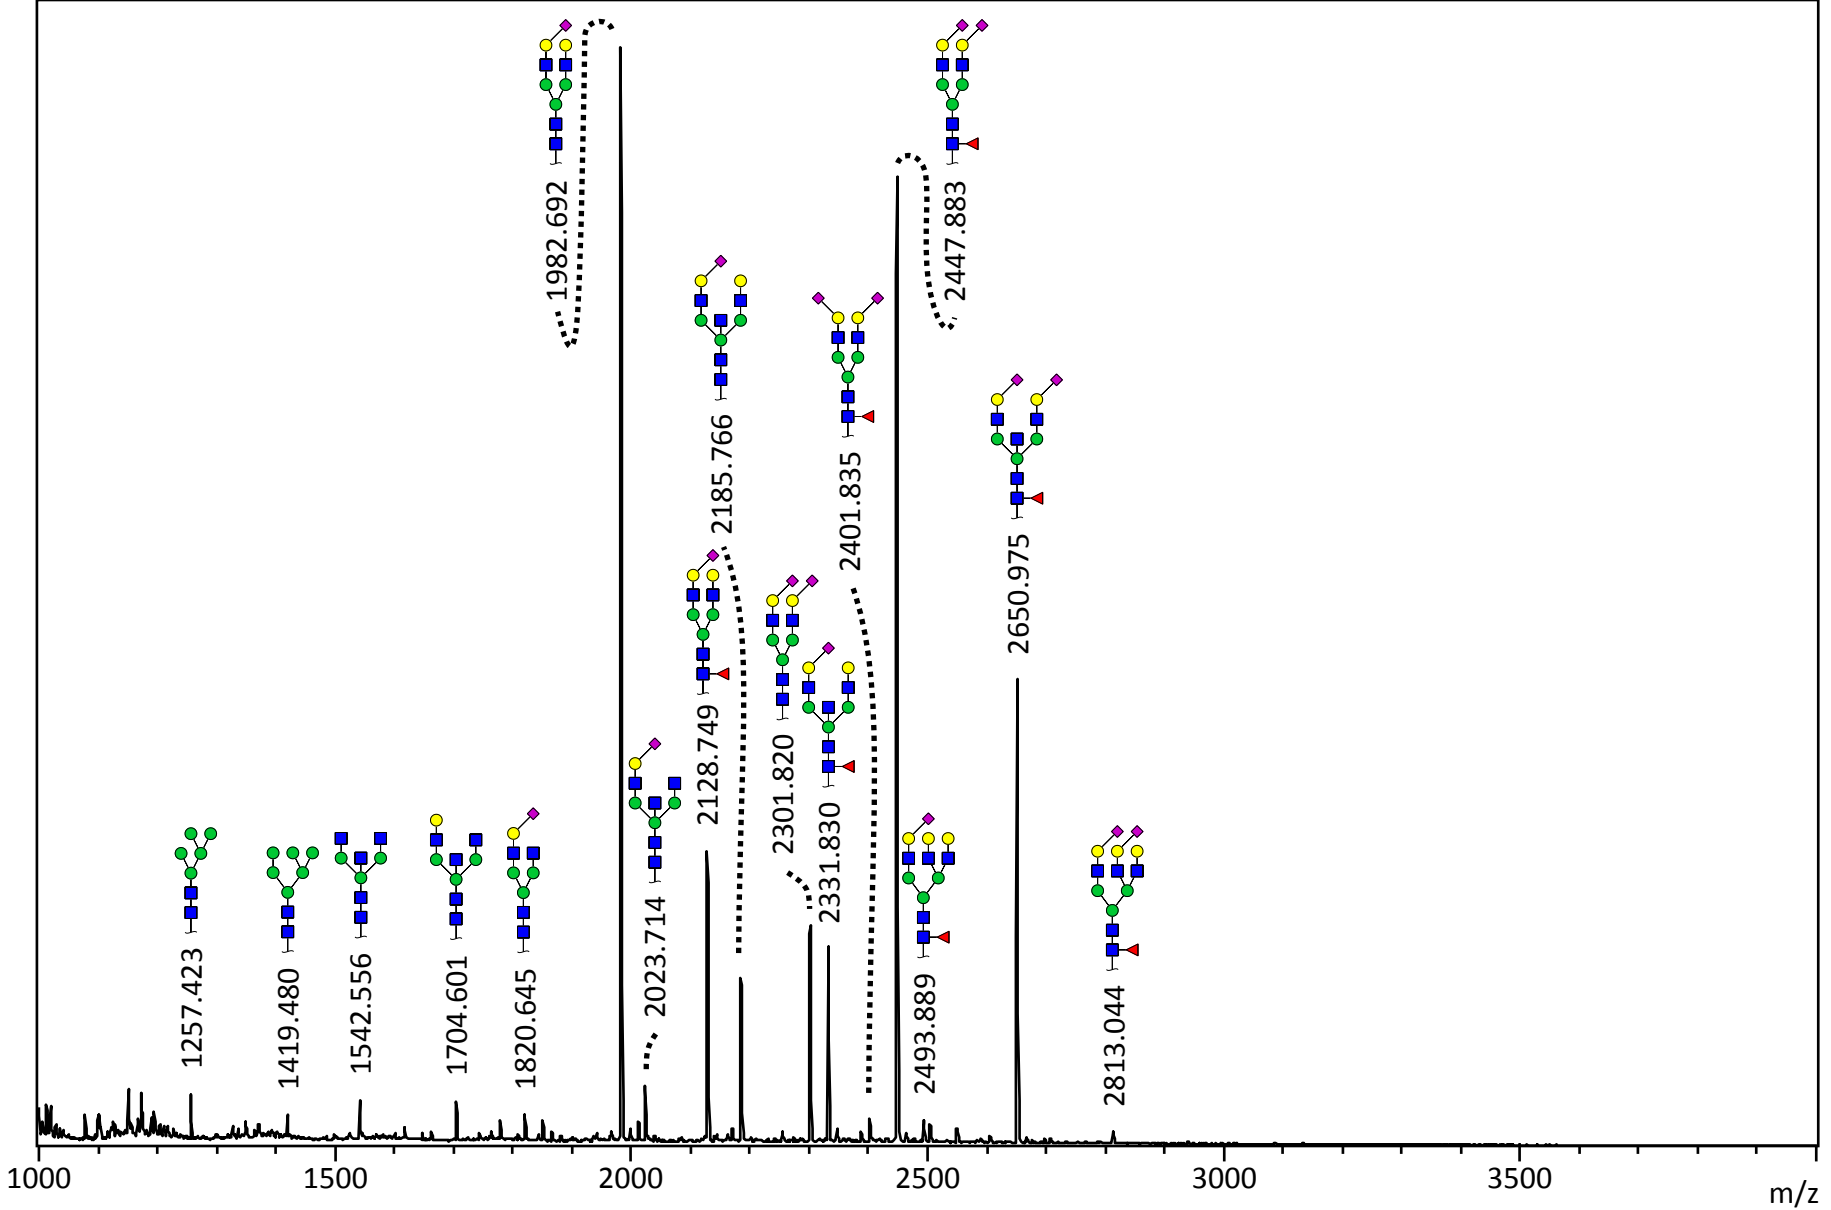

**Supplementary Figure S4** Annotated spectrum of released and ethyl esterified IgA N-glycans. Of note, not all observed released N-glycans were found on the IgA1 N-glycopeptides; these could be derived from e.g. IgA2.

## Supplementary Methods

### MALDI-FTICR-MS settings

MALDI-FTICR-MS was performed with the smartbeam-II<sup>TM</sup> laser system at a frequency of 200 Hz. The 'medium' predefined shot pattern was used for the irradiation while the 'random walk' was allowed for a diameter of 600  $\mu\text{m}$ . All MALDI-FTICR-MS spectra were acquired in the mass range from  $m/z$  3499 to  $m/z$  10000 as previously described with some modification.<sup>1</sup> Each mass spectrum was obtained from the sum of 15 scans of 150 laser shots each and using 256 K data points. The quadrupole mass filter was set to  $m/z$  2500 while the time of flight to the ICR cell was 2.0 ms. Before detection, ions were trapped in the ICR cell using a back and front trapping voltage of 0.95 V and 0.8 V, respectively, while during detection, both voltages were set to 0.5 V. The required excitation power and pulse time were 34% and 15  $\mu\text{s}$ , respectively.

### ESI-FTICR-MS settings

ESI-FTICR-MS measurements were performed at an infusion rate of 2  $\mu\text{L}/\text{min}$  using the quadrupole (Q) for precursor ion selection and a hexapole collision cell for collision-induced dissociation (CID). The ion funnels were operated at 100 and 6 V, respectively, with the skimmers at 15 V and 5 V. The trapping potentials were set at 1 V, the analyser entrance was maintained at -10 V, and side kick technology was used to further optimize peak shape and signal intensity. The required excitation power was 19% with a pulse time of 10  $\mu\text{s}$ . MS/MS-experiments were performed by CID and fragment ion mass analysis in the ICR cell. For these experiments, the collision energy, the accumulation time in the hexapole collision cell and the isolation window in the Q were optimized for each precursor ion. Collision energies varied from -5.5 V to -10.5 V while the accumulation times varied from 5 s to 10 s.

## LC-ESI-MS/MS

One microliter of sample was loaded onto a C18  $\mu$ -pre column (C18 PepMap 100, 300  $\mu\text{m}$   $\times$  5 mm, 5 $\mu\text{m}$ , 100 Å, Dionex/Thermo Scientific) with 10  $\mu\text{L}/\text{min}$  of loading solvent (98% water/ 2% ACN/ 0.1% TFA) for 5 min. The analytes were then separated on a C18 analytical column (Acclaim PepMap RSLC, 75  $\mu\text{m}$   $\times$  15 cm, 5  $\mu\text{m}$ , 2  $\mu\text{m}$ , 100 Å, Dionex/Thermo Scientific). Elution was performed at a flow rate of 0.7  $\mu\text{L}/\text{min}$  with solvent A (water containing 0.1% FA (v/v)) and solvent B (80% acetonitrile/ 20% water containing 0.1% FA (v/v)). A linear gradient of 3–50% solvent B in 42.5 min was applied followed by column washing and reconditioning.

Ionization using a captiveSpray was enhanced by a nanoBooster using acetonitrile with 0.2 bar. The source parameters were as followed: dry gas 3 L/min with 150°C; capillary voltage 1200 V.

The mass spectrometer was tuned using ESI-L-low concentration tune mix (Agilent Technologies, Santa Clara, CA, USA). MS spectra were acquired within a mass range of 50-2800  $m/z$  and a spectra rate of 1 Hz. MS transfer settings were as followed: Funnel 1RF 300 Vpp; Multipole RF 300 Vpp; Quadrupole ion energy 3 eV; low mass 100  $m/z$ ; collision cell Energy 5eV; pre pulse storage 10  $\mu\text{s}$ . Basic stepping mode was applied for the collision RF (500-1300 Vpp), transfer time (90-130  $\mu\text{s}$ ) and MS/MS collision energy (80-140%) each 50% of the time. Detailed collision energies for quadruply charged ions, as were selected for MS/MS, were:  $m/z$  500 at 20 eV,  $m/z$  800 at 45 eV,  $m/z$  1300 at 65 eV.

## *N*-glycan release and sialic acid ethyl esterification

Eight replicates of the standard sample were reconstituted in 5  $\mu\text{L}$  PBS, followed by the addition of 10  $\mu\text{L}$  2% SDS (w/v). The samples were incubated for 10 min on a multiwell plate shaker before a 30 minute

incubation at 60°C. Subsequently, 10 µL of a 1:1 solution of 4% NP-40 and 5X PBS containing 1U PNGaseF was added. The glycan release was performed overnight at 37°C.

The released glycans were subjected to a sialic acid stabilization step as described before <sup>2,3</sup>, resulting in linkage specific modification of the sialic acids. Briefly, 10 µL released glycans were added to 100 µL 250 mM EDC (1-ethyl-3-(3-dimethylaminopropyl)carbodiimide hydrochloride; Fluorochem, Hadfield, UK) /250 mM HOBt (hydroxybenzotriazole hydrate; Sigma Aldrich) and incubated for 1h at 37°C. After the incubation, 100 µL ACN was added, followed by a 15 min incubation at -20°C. The samples were allowed to warm up to ambient temperature, after which the glycans were purified by cotton HILIC-SPE, as described before <sup>3</sup>. Purified glycans were spotted on a Bruker AnchorChip plate (part number 209514, 800 µm anchor; Bruker Daltonics) and mixed on spot with 5 mg/mL Super-DHB (Sigma) containing 1 mM NaOH. The sample were measured in reflectron positive mode on a Bruker fleXtreme MALDI-TOF mass spectrometer.

LC-ion trap-MS/MS for protein and peptide identification

IgA sample purity was assessed by proteomics analysis. The sample was prepared as described in the main manuscript. One microliter digest was diluted 100 times before injection onto the LC-ion trap MS/MS system. The analysis was performed as described before.<sup>4</sup> Using Data Analysis 4.0 (Bruker Daltonics, Bremen, Germany) compounds were generated from the LC-MS/MS runs, and the data was exported in the Mascot Generic File format. Mascot Deamon 2.2.2 allowed batch processing to indentify peptides using the uniprothuman 20150204 database with the addition of the truncated IGHA1, referred to as IGHA1b (89797 sequences; 35657535 residues), and the Mascot algorithm (Mascot 2.5.1, Matrix Science, London, UK). Mass tolerance was set at ±0.5 Da for both peptide and MS/MS fragments. The number of <sup>13</sup>C was set to 1. Oxidation of methionine (variable), deamidation of asparagine/glutamine

(variable), and carbamidomethylation of cysteine (fixed) were selected as modification. Positive protein identification required at least two significant sequences and peptides with a score above 30.

In addition, a sample was digested O/N with PNGaseF to release the N-glycans. After the digestion, the sample and data were treated as described above.

The resulting data is summarized in Supplemental Table S1.

Formulae to calculate the different glycosylation traits.

The following formulae were used to calculate the glycosylation traits for both *N*- and *O*- glycosylation of IgA1. For earlier convenience all relative abundances were multiplied by 100. Therefore, the calculated traits resulting in the number of GalNAcs, galactoses or sialic acids were divided by 100. Abbreviations: Q = *O*-glycopeptide; H = hexose; N = *N*-acetylhexosamine; F = fucose; S = sialic acid; R = Asn144 containing *N*-glycopeptide; T = Asn340 containing *N*-glycopeptide; U = truncated Asn340 containing *N*-glycopeptide; \_O: oxidized.

Number of *N*-acetylgalactosamines:  $(3*(Q1H2N3F0S1 + Q1H2N3F0S2 + Q1H3N3F0S1 + Q1H3N3F0S2 + Q1H3N3F0S3) + 4*(Q1H2N4F0S0 + Q1H2N4F0S1 + Q1H2N4F0S2 + Q1H3N4F0S0 + Q1H3N4F0S1 + Q1H3N4F0S2 + Q1H3N4F0S3 + Q1H3N4F0S4 + Q1H4N4F0S0 + Q1H4N4F0S1 + Q1H4N4F0S2 + Q1H4N4F0S3 + Q1H4N4F0S4 + Q1H4N4F0S5 + Q1H4N4F0S6) + 5*(Q1H2N5F0S1 + Q1H2N5F0S2 + Q1H3N5F0S0 + Q1H3N5F0S1 + Q1H3N5F0S2 + Q1H3N5F0S3 + Q1H3N5F0S4 + Q1H4N5F0S0 + Q1H4N5F0S1 + Q1H4N5F0S2 + Q1H4N5F0S3 + Q1H4N5F0S4 + Q1H4N5F0S5 + Q1H4N5F0S6 + Q1H5N5F0S1 + Q1H5N5F0S2 + Q1H5N5F0S3 + Q1H5N5F0S4 + Q1H5N5F0S5 + Q1H5N5F0S6 + Q1H5N5F0S7) + 6*(Q1H3N6F0S2 + Q1H3N6F0S3 + Q1H4N6F0S1 + Q1H4N6F0S2 + Q1H4N6F0S3 + Q1H4N6F0S4 + Q1H4N6F0S5 + Q1H5N6F0S2 + Q1H5N6F0S3 + Q1H5N6F0S4 + Q1H5N6F0S5 + Q1H6N6F0S4 + Q1H6N6F0S5))/100$

Number of galactoses:  $(2*(Q1H2N3F0S1 + Q1H2N3F0S2 + Q1H2N4F0S0 + Q1H2N4F0S1 + Q1H2N4F0S2 + Q1H2N5F0S1 + Q1H2N5F0S2) + 3*(Q1H3N3F0S1 + Q1H3N3F0S2 + Q1H3N3F0S3 + Q1H3N4F0S0 + Q1H3N4F0S1 + Q1H3N4F0S2 + Q1H3N4F0S3 + Q1H3N4F0S4 + Q1H3N5F0S0 + Q1H3N5F0S1 + Q1H3N5F0S2 + Q1H3N5F0S3 + Q1H3N5F0S4 + Q1H3N6F0S2 + Q1H3N6F0S3) + 4*(Q1H4N4F0S0 + Q1H4N4F0S1 + Q1H4N4F0S2 + Q1H4N4F0S3 + Q1H4N4F0S4 + Q1H4N4F0S5 + Q1H4N4F0S6 + Q1H4N5F0S0 + Q1H4N5F0S1 + Q1H4N5F0S2 + Q1H4N5F0S3 + Q1H4N5F0S4 + Q1H4N5F0S5 + Q1H4N5F0S6 + Q1H4N6F0S1 + Q1H4N6F0S2 + Q1H4N6F0S3 + Q1H4N6F0S4 + Q1H4N6F0S5) + 5*(Q1H5N5F0S1 + Q1H5N5F0S2 + Q1H5N5F0S3 + Q1H5N5F0S4 + Q1H5N5F0S5 + Q1H5N5F0S6 + Q1H5N5F0S7 + Q1H5N6F0S2 + Q1H5N6F0S3 + Q1H5N6F0S4 + Q1H5N6F0S5) + 6*(Q1H6N6F0S4 + Q1H6N6F0S5))/100$

Number of sialic acids:  $(1*(Q1H2N3F0S1 + Q1H2N4F0S1 + Q1H2N5F0S1 + Q1H3N3F0S1 + Q1H3N4F0S1 + Q1H3N5F0S1 + Q1H4N4F0S1 + Q1H4N5F0S1 + Q1H4N6F0S1 + Q1H5N5F0S1) + 2*(Q1H2N3F0S2 + Q1H2N4F0S2 + Q1H2N5F0S2 + Q1H3N3F0S2 + Q1H3N4F0S2 + Q1H3N5F0S2 + Q1H3N6F0S2 + Q1H4N4F0S2 + Q1H4N5F0S2 + Q1H4N6F0S2 + Q1H5N5F0S2 + Q1H5N6F0S2) + 3*(Q1H3N3F0S3 + Q1H3N4F0S3 + Q1H3N5F0S3 + Q1H3N6F0S3 + Q1H4N4F0S3 + Q1H4N5F0S3 + Q1H4N6F0S3 + Q1H5N5F0S3 + Q1H5N6F0S3) + 4*(Q1H3N4F0S4 + Q1H3N5F0S4 + Q1H4N4F0S4 + Q1H4N5F0S4 + Q1H4N6F0S4 + Q1H5N5F0S4 + Q1H5N6F0S4 + Q1H6N6F0S4) + 5*(Q1H4N4F0S5 + Q1H4N5F0S5 + Q1H4N6F0S5 + Q1H5N5F0S5 + Q1H5N6F0S5 + Q1H6N6F0S5) + 6*(Q1H4N4F0S6 + Q1H4N5F0S6 + Q1H5N5F0S6) + 7*(Q1H5N5F0S7))/100$

Ratio of sialic acids per galactose: 'Number of sialic acids' / 'Number of galactoses'

Ratio of galactoses per GalNAc: 'Number of galactoses' / 'Number of GalNAcs'

Abundance of peptides with more GalNAc than galactoses:  $Q1H2N3F0S1 + Q1H2N3F0S2 + Q1H2N4F0S0 + Q1H2N4F0S1 + Q1H2N4F0S2 + Q1H2N5F0S1 + Q1H2N5F0S2 + Q1H3N4F0S0 + Q1H3N4F0S1 +$

Q1H3N4F0S2 + Q1H3N4F0S3 + Q1H3N4F0S4 + Q1H3N5F0S0 + Q1H3N5F0S1 + Q1H3N5F0S2 +  
Q1H3N5F0S3 + Q1H3N5F0S4 + Q1H3N6F0S2 + Q1H3N6F0S3 + Q1H4N5F0S0 + Q1H4N5F0S1 +  
Q1H4N5F0S2 + Q1H4N5F0S3 + Q1H4N5F0S4 + Q1H4N5F0S5 + Q1H4N5F0S6 + Q1H4N6F0S1 +  
Q1H4N6F0S2 + Q1H4N6F0S3 + Q1H4N6F0S4 + Q1H4N6F0S5 + Q1H5N6F0S2 + Q1H5N6F0S3 +  
Q1H5N6F0S4 + Q1H5N6F0S5

Abundance of peptides with more sialic acids than galactoses: Q1H3N4F0S4 + Q1H3N5F0S4 +  
Q1H4N4F0S5 + Q1H4N4F0S6 + Q1H4N5F0S5 + Q1H4N5F0S6 + Q1H4N6F0S5 + Q1H5N5F0S6 +  
Q1H5N5F0S7

Asn144 sialylation:  $0.5 * (R1H5N4F0S1 + R1H5N5F0S1) + 1 * (R1H5N4F0S2 + R1H5N5F0S2)$

Asn144 bisection: R1H5N5F0S0 + R1H5N5F0S1 + R1H5N5F0S2

Asn340 sialylation:  $0.5 * (T1H5N4F1S1\_O1) + 1 * (T1H5N4F1S2\_O1 + T1H5N5F1S2\_O1)$

Asn340 bisection: T1H5N5F1S2\_O1

Truncated Asn340 diantennary galactosylation:  $((0.5 * (U1H4N4F0S1) + 1 * (U1H5N4F0S1 +$   
U1H5N4F0S1\_O1 + U1H5N4F0S2\_O1 + U1H5N4F1S0\_O1 + U1H5N4F1S1 + U1H5N4F1S1\_O1 +  
U1H5N4F1S2 + U1H5N4F1S2\_O1 + U1H5N5F0S1 + U1H5N5F0S1\_O1 + U1H5N5F0S2 + U1H5N5F1S0\_O1 +  
U1H5N5F1S1 + U1H5N5F1S1\_O1 + U1H5N5F1S2 + U1H5N5F1S2\_O1)) / (U1H4N4F0S1 + U1H5N4F0S1 +  
U1H5N4F0S1\_O1 + U1H5N4F0S2\_O1 + U1H5N4F1S0\_O1 + U1H5N4F1S1 + U1H5N4F1S1\_O1 +  
U1H5N4F1S2 + U1H5N4F1S2\_O1 + U1H5N5F0S1 + U1H5N5F0S1\_O1 + U1H5N5F0S2 + U1H5N5F1S0\_O1 +  
U1H5N5F1S1 + U1H5N5F1S1\_O1 + U1H5N5F1S2 + U1H5N5F1S2\_O1)) \* 100

Truncated Asn340 diantennary sialylation:  $((0.5 * (U1H4N4F0S1 + U1H5N4F0S1 + U1H5N4F0S1\_O1 +$   
U1H5N4F1S1 + U1H5N4F1S1\_O1 + U1H5N5F0S1 + U1H5N5F0S1\_O1 + U1H5N5F1S1 + U1H5N5F1S1\_O1)  
+ 1 \* (U1H5N4F0S2\_O1 + U1H5N4F1S2 + U1H5N4F1S2\_O1 + U1H5N5F0S2 + U1H5N5F1S2 +



$$\frac{U1H5N5F1S2\_O1)}{(U1H4N4F0S1 + U1H5N4F0S1 + U1H5N4F0S1\_O1 + U1H5N4F0S2\_O1 + U1H5N4F1S0\_O1 + U1H5N4F1S1 + U1H5N4F1S1\_O1 + U1H5N4F1S2 + U1H5N4F1S2\_O1 + U1H5N5F0S1 + U1H5N5F0S1\_O1 + U1H5N5F0S2 + U1H5N5F1S0\_O1 + U1H5N5F1S1 + U1H5N5F1S1\_O1 + U1H5N5F1S2 + U1H5N5F1S2\_O1))*100$$

Truncated Asn340 diantennary fucosylation: 
$$\frac{((U1H5N4F1S0\_O1 + U1H5N4F1S1 + U1H5N4F1S1\_O1 + U1H5N4F1S2 + U1H5N4F1S2\_O1 + U1H5N5F1S0\_O1 + U1H5N5F1S1 + U1H5N5F1S1\_O1 + U1H5N5F1S2 + U1H5N5F1S2\_O1))/(U1H4N4F0S1 + U1H5N4F0S1 + U1H5N4F0S1\_O1 + U1H5N4F0S2\_O1 + U1H5N4F1S0\_O1 + U1H5N4F1S1 + U1H5N4F1S1\_O1 + U1H5N4F1S2 + U1H5N4F1S2\_O1 + U1H5N5F0S1 + U1H5N5F0S1\_O1 + U1H5N5F0S2 + U1H5N5F1S0\_O1 + U1H5N5F1S1 + U1H5N5F1S1\_O1 + U1H5N5F1S2 + U1H5N5F1S2\_O1))*100$$

Truncated Asn340 diantennary bisection: 
$$\frac{((U1H5N5F0S1 + U1H5N5F0S1\_O1 + U1H5N5F0S2 + U1H5N5F1S0\_O1 + U1H5N5F1S1 + U1H5N5F1S1\_O1 + U1H5N5F1S2 + U1H5N5F1S2\_O1))/(U1H4N4F0S1 + U1H5N4F0S1 + U1H5N4F0S1\_O1 + U1H5N4F0S2\_O1 + U1H5N4F1S0\_O1 + U1H5N4F1S1 + U1H5N4F1S1\_O1 + U1H5N4F1S2 + U1H5N4F1S2\_O1 + U1H5N5F0S1 + U1H5N5F0S1\_O1 + U1H5N5F0S2 + U1H5N5F1S0\_O1 + U1H5N5F1S1 + U1H5N5F1S1\_O1 + U1H5N5F1S2 + U1H5N5F1S2\_O1))*100$$

Truncated Asn340 triantennary: 
$$U1H6N5F1S1\_O1 + U1H6N5F1S3\_O1 + U1H6N6F0S0\_O1$$

## References

- 1 Nicolardi, S., van der Burgt, Y. E. M., Wuhrer, M. & Deelder, A. M. Mapping O-glycosylation of apolipoprotein C-III in MALDI-FT-ICR protein profiles. *Proteomics* **13**, 992-1001, doi:10.1002/pmic.201200293 (2013).
- 2 Reiding, K. R., Blank, D., Kuijper, D. M., Deelder, A. M. & Wuhrer, M. High-Throughput Profiling of Protein N-Glycosylation by MALDI-TOF-MS Employing Linkage-Specific Sialic Acid Esterification. *Anal. Chem.* **86**, 5784-5793, doi:Doi 10.1021/Ac500335t (2014).

- 3 Bondt, A. *et al.* Immunoglobulin G (IgG) Fab glycosylation analysis using a new mass spectrometric high-throughput profiling method reveals pregnancy-associated changes. *Mol. Cell. Proteomics* **13**, 3029-3039, doi:10.1074/mcp.M114.039537 (2014).
- 4 Zauner, G. *et al.* Glycoproteomic Analysis of Human Fibrinogen Reveals Novel Regions of O-Glycosylation. *J. Proteome Res.* **11**, 5804-5814, doi:10.1021/pr3005937 (2012).
